# Supplementary material for: Integrative analysis of DNA methylation suggests down-regulation of oncogenic pathways and reduced somatic mutation rates in survival outliers of glioblastoma
Source: Springer Nature journal article supplement (doi:10.1186/s40478-019-0744-0), 2019-06-03
Supplement: MOESM1 [file 25666808]

1 **Supplementary figure 1**

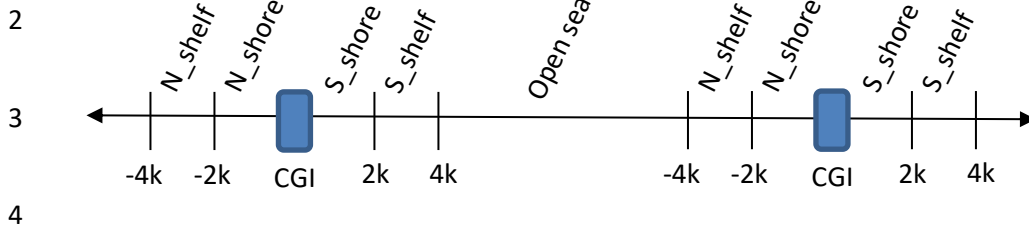

5 **Classification of the sites in the 450k bead array according to CGI.** The probes or sites were  
6 grouped into four categories according to the distance from the closest CGI: i) “island” if a probe  
7 is inside CGI, ii) “shore” if a probe is within 2000 bases, iii) “shelf” if a probe is between 2000  
8 and 4000 bases, iv) “open sea” otherwise. Further categories were made by distinguishing 5’  
9 and 3’ direction from the closest CGI denoted by ‘N\_’ and ‘S\_’ respectively such as ‘N\_shore’  
10 and ‘S\_shore’.

11

12

13

14

15

16

17

18

19

20 **Supplementary figure 2**

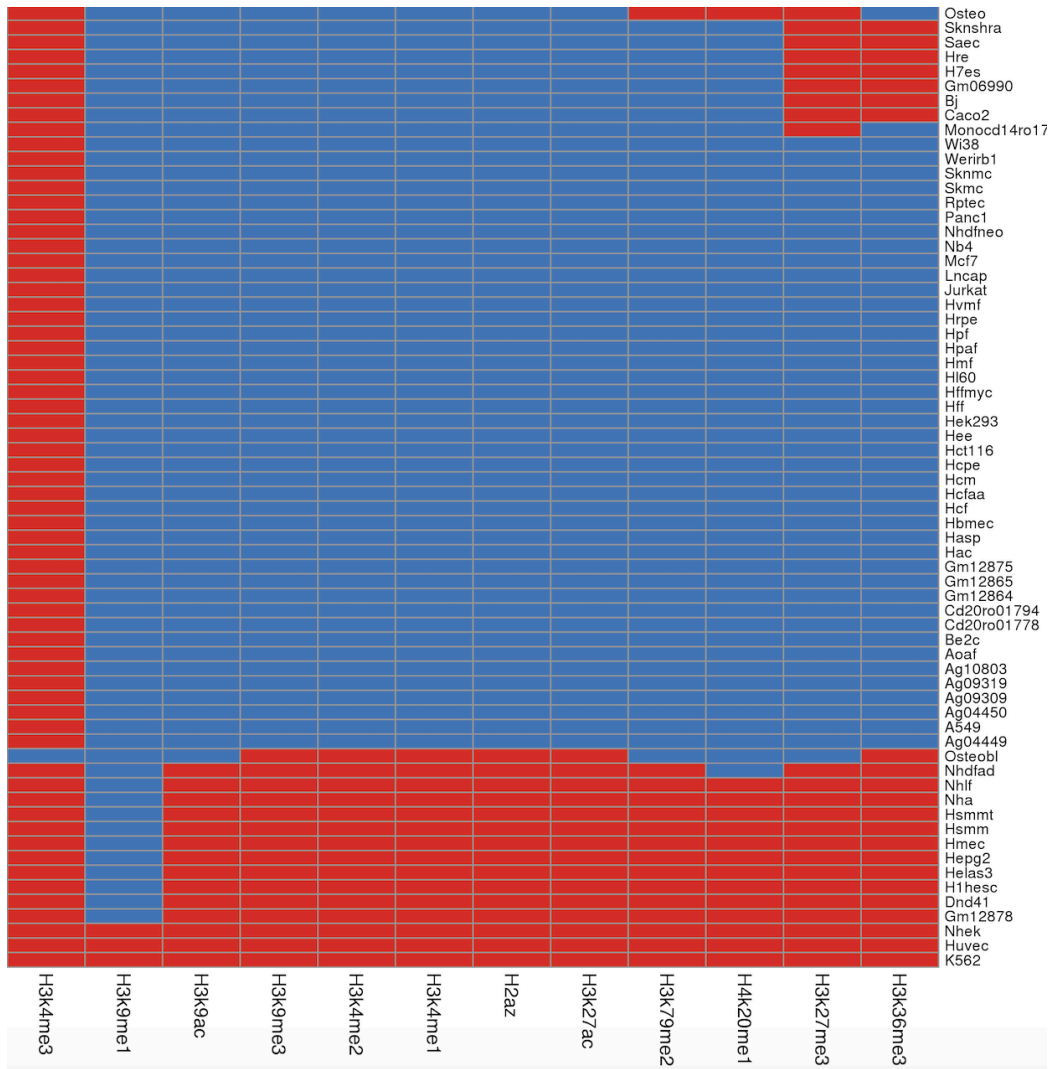

21

22 **The cells and histone marks obtained from ENCODE.** The red denotes the one used in the  
 23 enrichment analyses while the blue indicates no data point available during this study.

24

25

26

27 **Supplementary figure 3**

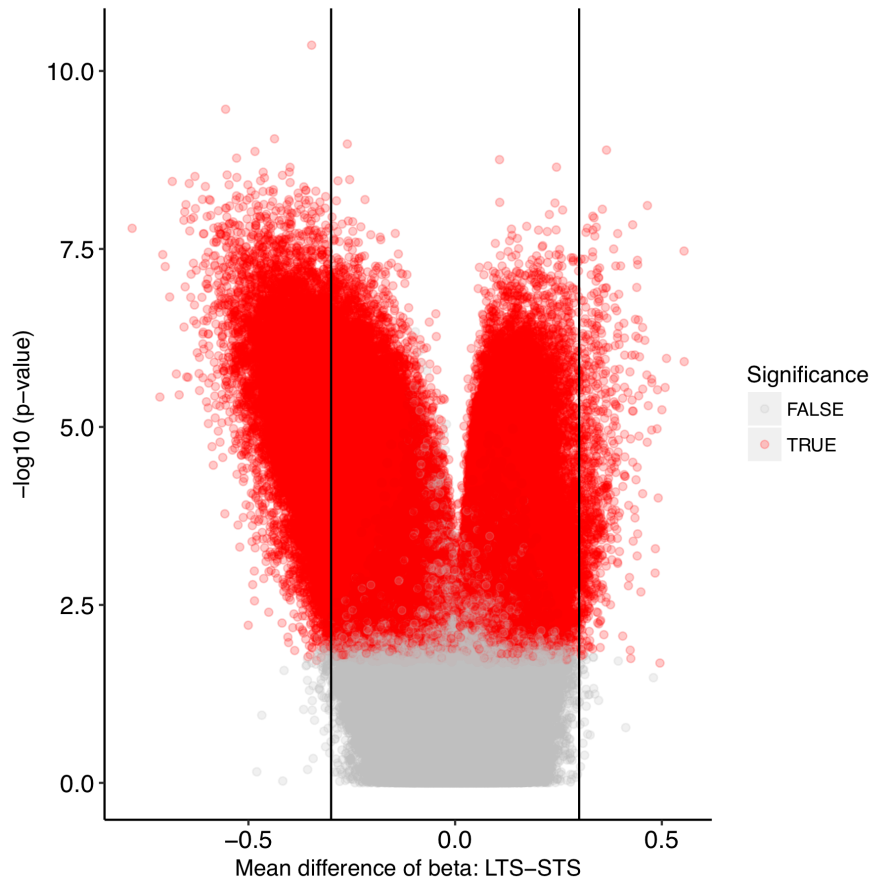

28

29 **Volcano plot of differences between STS-GBM and LTS-GBM in DNA methylation level**

30 **(beta)**. Each dot is a single CpG site measured by a probe. X axis is mean difference of beta  
31 values between STS-GBM and LTS-GBM groups. Y axis is statistical significance (p-value) in  
32 negative log (base: 10) scale. Red dots indicate significant sites while green dots correspond to  
33 sites without statistical significance, determined by the threshold of FDR of 0.01. Two vertical  
34 lines denote mean differences of -0.3 and 0.3 respectively.

35

36

37

38 **Supplementary figure 4**

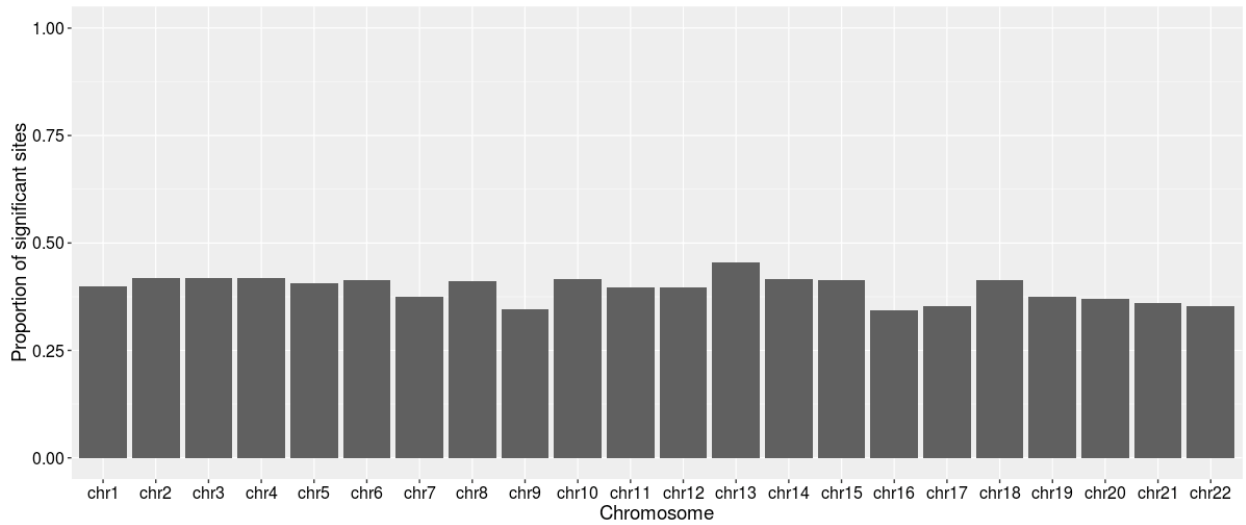

39

40 **Proportion of the number of significant sites according to chromosomes.** X axis is  
41 autosomal chromosome and Y axis is proportion of the significant sites that identified in  
42 discovery samples of LTS (n=17) and STS (n=12) in a given chromosome (number of significant  
43 sites divided by total number of sites that were tested).

44

45

46

47

48

49

50

51

52

53

54 **Supplementary figure 5**

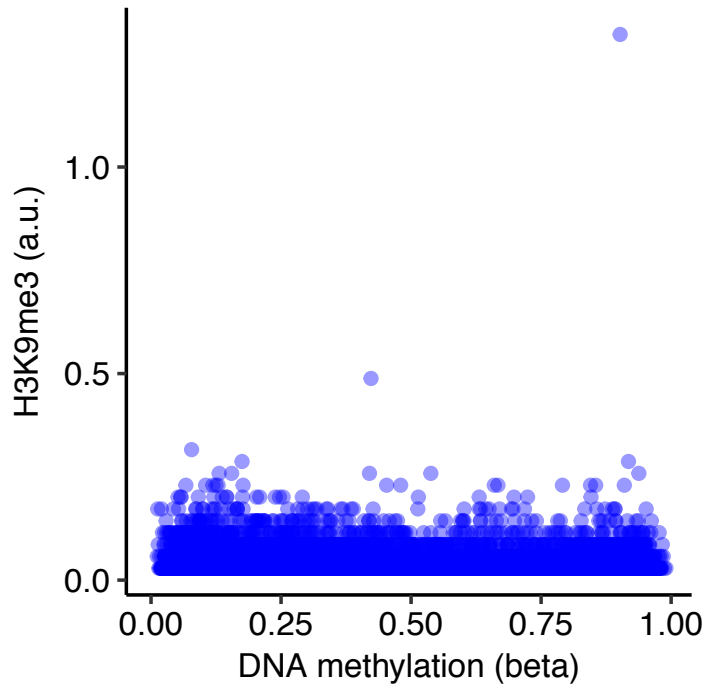

55  
56

57 **The relation between the ChIP-seq signal of H3K9me3 and the DNA methylation level**  
58 **(beta) for the hyper-methylated sites in U87 cell line.** Each dot denotes the hypomethylated  
59 site.

60

61

62

63

64

65

66

67

68

69

70 **Supplementary figure 6**

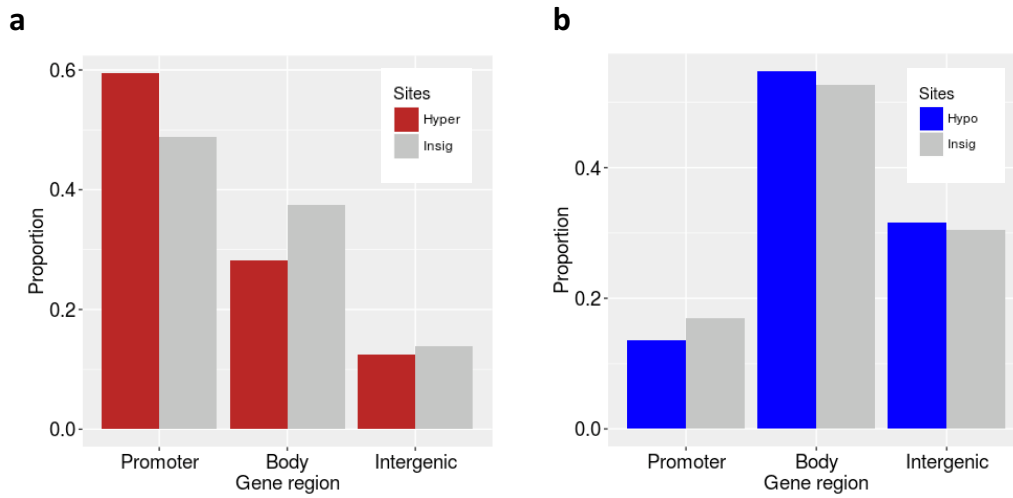

71

72 **Enrichment of significant differential sites in gene regions. (a)** Hypermethylated sites in  
73 island **(b)** Hypomethylated sites in open sea. Promoter is enriched with the hypermethylated  
74 site relative to gene body while gene body is enriched with the hypomethylated site relative to  
75 promoter ( $p$ -values  $< 10^{-15}$  from Fisher exact tests in both cases).

76

77

78

79

80

81

82

83

84

85

86

87

88

89 **Supplementary figure 7**

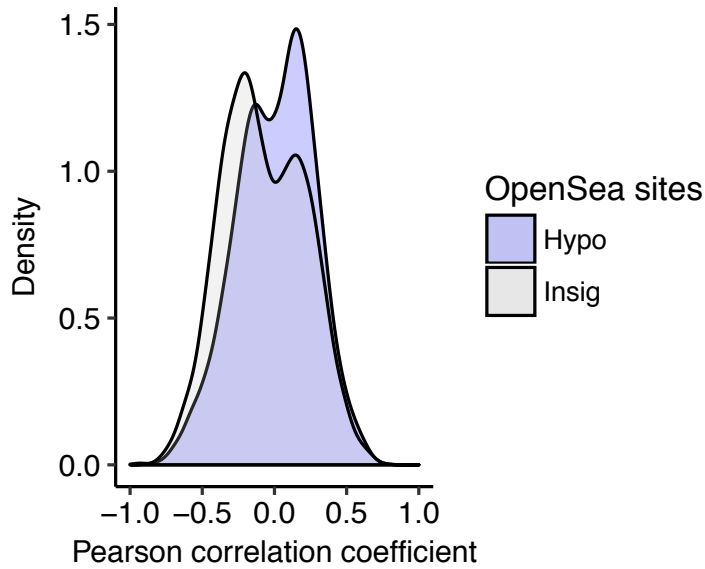

90

91 **Distribution of Pearson correlation coefficients between DNA methylation level (beta) and**  
92 **gene expression measured by RNA-seq (FPKM) across GBM samples in TCGA.** The blue  
93 describes the genes (# 3026) corresponding to the selected hypo-methylated sites while the  
94 gray shows the genes (# 4717) matching to the insignificant sites associated with the open sea.

95

96

97

98

99

100

101

102

103

104

105

106

107 **Supplementary figure 8**

108

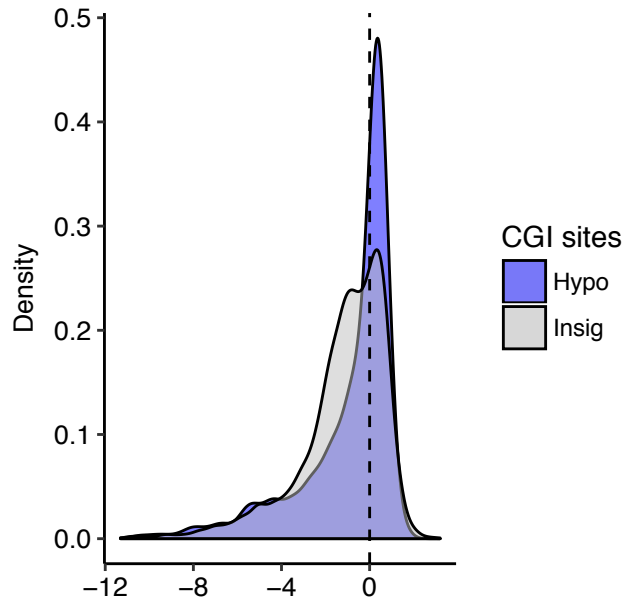

109

Z-score of DNA methylation value with mutation

110 **Distribution of Z-score of DNA methylation of the sample with somatic mutation.** A Z-  
111 score, calculated by  $(\text{beta-mean})/\text{standard deviation}$  represents the relative location of the  
112 sample with mutation in terms of DNA methylation level. The hypo-methylated showed the  
113 stronger shift to the right to the zero value of Z-score, meaning higher DNA methylation than  
114 the other samples on average, compared to the insignificant sites.

115

116

117

118

119

120

121

122

123

124



125 **Supplementary table 1**

126

| Cohort                            |                | Case No.   | Gender    | Age                    | Survival   | Management protocol        | IDH1 IHC | MGMT MSP      | PFS        | Final status |
|-----------------------------------|----------------|------------|-----------|------------------------|------------|----------------------------|----------|---------------|------------|--------------|
| <i>Discovery cohort (SNU-LTS)</i> | LTS (>3 years) | SNUL TS-02 | male      | 46 years               | 138 months | Resection-ACNU/CDDP-RT     | negative | methylation   | 138 months | alive        |
|                                   |                | SNUL TS-07 | female    | 30 years               | 104 months | Resection-ACNU/CDDP-RT     | negative | N.A.          | 104 months | alive        |
|                                   |                | SNUL TS-10 | female    | 48 years               | 95 months  | Resection-ACNU/CDDP-RT     | negative | N.A.          | 95 months  | alive        |
|                                   |                | SNUL TS-18 | male      | 50 years               | 59 months  | Resection-ACNU/CDDP-RT     | negative | N.A.          | N.A.       | dead         |
|                                   |                | SNUL TS-19 | female    | 45 years               | 59 months  | Resection-ACNU/CDDP-RT-TMZ | negative | methylation   | 20 months  | dead         |
|                                   |                | SNUL TS-20 | female    | 38 years               | 58 months  | Resection-RT-TMZ           | negative | unmethylation | 58 months  | alive        |
|                                   |                | SNUL TS-21 | female    | 33 years               | 53 months  | Resection-RT-TMZ           | negative | N.A.          | 24 months  | dead         |
|                                   |                | SNUL TS-22 | female    | 28 years               | 49 months  | Resection-CCRT/TMZ-TMZ     | negative | methylation   | 41 months  | dead         |
|                                   |                | SNUL TS-23 | female    | 28 years               | 46 months  | Resection-CCRT/TMZ         | negative | unmethylation | 46 months  | alive        |
|                                   |                | SNUL TS-25 | female    | 57 years               | 44 months  | Biopsy-CCRT/TMZ-TMZ        | negative | unmethylation | N.A.       | dead         |
|                                   |                | SNUL TS-26 | male      | 48 years               | 42 months  | Resection-ACNU/CDDP-RT-TMZ | negative | unmethylation | N.A.       | dead         |
|                                   |                | SNUL TS-27 | male      | 81 years               | 42 months  | Resection-CCRT/TMZ-TMZ     | negative | methylation   | N.A.       | dead         |
| SNUL TS-29                        | male           | 41 years   | 41 months | Resection-CCRT/TMZ-TMZ | negative   | methylation                | N.A.     | dead          |            |              |

|               |  |            |        |          |           |                        |          |               |           |      |
|---------------|--|------------|--------|----------|-----------|------------------------|----------|---------------|-----------|------|
|               |  | SNUL TS-30 | male   | 57 years | 41 months | Resection-CCRT/TMZ-TMZ | negative | unmethylation | 26 months | dead |
|               |  | SNUL TS-31 | female | 54 years | 41 months | Resection-ACNU/CDDP-RT | negative | unmethylation | N.A.      | dead |
|               |  | SNUL TS-33 | female | 57 years | 38 months | Resection-RT-TMZ       | negative | N.A.          | N.A.      | dead |
|               |  | SNUL TS-34 | male   | 43 years | 36 months | Resection-CCRT/TMZ-TMZ | negative | Unmethylated  | 27 months | dead |
| STS (<1 year) |  | SNUS TS-01 | male   | 55 years | 40 weeks  | Resection-CCRT/TMZ-TMZ | negative | methylation   | 26 weeks  | dead |
|               |  | SNUS TS-02 | male   | 45 years | 54 weeks  | Resection-CCRT/TMZ-TMZ | negative | unmethylation | 26 weeks  | dead |
|               |  | SNUS TS-03 | female | 64 years | 52 weeks  | Resection-CCRT/TMZ-TMZ | negative | methylation   | N.A.      | dead |
|               |  | SNUS TS-04 | female | 68 years | 26 weeks  | Resection-CCRT/TMZ-TMZ | negative | unmethylation | N.A.      | dead |
|               |  | SNUS TS-05 | male   | 70 years | 52 weeks  | Resection-CCRT/TMZ-TMZ | negative | unmethylation | N.A.      | dead |
|               |  | SNUS TS-06 | male   | 42 years | 37 weeks  | Resection-CCRT/TMZ-TMZ | negative | methylation   | 31 weeks  | dead |
|               |  | SNUS TS-07 | male   | 63 years | 50 weeks  | Resection-CCRT/TMZ-TMZ | negative | unmethylation | 38 weeks  | dead |
|               |  | SNUS TS-08 | male   | 62 years | 37 weeks  | Resection-CCRT/TMZ-TMZ | negative | unmethylation | 20 weeks  | dead |
|               |  | SNUS TS-09 | female | 60 years | 45 weeks  | Resection-CCRT/TMZ-TMZ | negative | unmethylation | 15 weeks  | dead |
|               |  | SNUS TS-10 | male   | 59 years | 52 weeks  | Resection-CCRT/TMZ-TMZ | negative | methylation   | 35 weeks  | dead |
|               |  | SNUS TS-11 | male   | 39 years | 47 weeks  | Resection-CCRT/TMZ-TMZ | negative | methylation   | 40 weeks  | dead |

|                                             |                                                                                                                                                                                                                                                                                                                                                                                                         |                                                                       |                          |                                          |                   |                                                     |              |                   |                  |          |
|---------------------------------------------|---------------------------------------------------------------------------------------------------------------------------------------------------------------------------------------------------------------------------------------------------------------------------------------------------------------------------------------------------------------------------------------------------------|-----------------------------------------------------------------------|--------------------------|------------------------------------------|-------------------|-----------------------------------------------------|--------------|-------------------|------------------|----------|
|                                             |                                                                                                                                                                                                                                                                                                                                                                                                         | SNUS<br>TS-12                                                         | male                     | 61<br>years                              | 23<br>weeks       | Resection-<br>CCRT/TMZ-<br>TMZ                      | negat<br>ive | unmethyl<br>ation | N.A.             | dea<br>d |
| <i>Valida<br/>tion<br/>cohort<br/>(AUS)</i> | LTS<br>(>3<br>yea<br>rs)                                                                                                                                                                                                                                                                                                                                                                                | AUS-<br>01                                                            | male                     | 56<br>yea<br>rs                          | 55<br>mont<br>hs  | Resection-<br>CCRT/TMZ-<br>TMZ/Bev                  | negat<br>ive | unmethyl<br>ation | 38<br>mon<br>ths | dea<br>d |
|                                             |                                                                                                                                                                                                                                                                                                                                                                                                         | AUS-<br>02                                                            | male                     | 62<br>yea<br>rs                          | 86<br>mont<br>hs  | Resection-<br>CCRT/TMZ-<br>TMZ                      | negat<br>ive | methylati<br>on   | N.A.             | dea<br>d |
|                                             |                                                                                                                                                                                                                                                                                                                                                                                                         | AUS-<br>03                                                            | male                     | 20<br>yea<br>rs                          | 76<br>mont<br>hs  | Resection-<br>CCRT/Procarb<br>azine                 | negat<br>ive | methylati<br>on   | N.A.             | dea<br>d |
|                                             |                                                                                                                                                                                                                                                                                                                                                                                                         | AUS-<br>04                                                            | fema<br>le               | 36<br>yea<br>rs                          | 66<br>mont<br>hs  | Resection-<br>TMZ/Procarba<br>zine/Bev              | negat<br>ive | unmethyl<br>ation | N.A.             | dea<br>d |
|                                             |                                                                                                                                                                                                                                                                                                                                                                                                         | AUS-<br>05                                                            | male                     | 61<br>yea<br>rs                          | 83<br>mont<br>hs  | Resection-<br>CCRT/TMZ-<br>TMZ/Procarba<br>zine/Bev | negat<br>ive | methylati<br>on   | N.A.             | dea<br>d |
|                                             |                                                                                                                                                                                                                                                                                                                                                                                                         | AUS-<br>07                                                            | male                     | 34<br>yea<br>rs                          | 135<br>mont<br>hs | Resection-<br>CCRT/TMZ-<br>TMZ                      | positi<br>ve | unmethyl<br>ation | N.A.             | dea<br>d |
|                                             |                                                                                                                                                                                                                                                                                                                                                                                                         | AUS-<br>08                                                            | male                     | 64<br>yea<br>rs                          | 58<br>mont<br>hs  | Resection-<br>CCRT/TMZ-<br>TMZ                      | N.A.         | unmethyl<br>ation | 45<br>mon<br>ths | dea<br>d |
|                                             |                                                                                                                                                                                                                                                                                                                                                                                                         | AUS-<br>09                                                            | male                     | 57<br>yea<br>rs                          | 48<br>mont<br>hs  | Resection-<br>CCRT/TMZ-<br>TMZ                      | N.A.         | unmethyl<br>ation | 33<br>mon<br>ths | dea<br>d |
|                                             |                                                                                                                                                                                                                                                                                                                                                                                                         | AUS-<br>10                                                            | fema<br>le               | 54<br>yea<br>rs                          | 95<br>mont<br>hs  | Resection-<br>CCRT/TMZ-<br>TMZ                      | N.A.         | unmethyl<br>ation | 16<br>mon<br>ths | dea<br>d |
|                                             |                                                                                                                                                                                                                                                                                                                                                                                                         | AUS-<br>11                                                            | fema<br>le               | 77<br>yea<br>rs                          | 76<br>mont<br>hs  | Resection-<br>CCRT/TMZ-<br>TMZ                      | N.A.         | methylati<br>on   | N.A.             | dea<br>d |
|                                             |                                                                                                                                                                                                                                                                                                                                                                                                         | <i>Valida<br/>tion<br/>cohort<br/>(TCG<br/>A<br/>patien<br/>t ID)</i> | LTS<br>(>3<br>yea<br>rs) | TCGA-06-0125, TCGA-76-4932, TCGA-14-1450 |                   |                                                     |              |                   |                  |          |
| STS<br>(<1<br>yea<br>r)                     | TCGA-14-1043, TCGA-14-0781, TCGA-32-1980, TCGA-14-1395, TCGA-06-6391, TCGA-81-5910, TCGA-19-5955, TCGA-12-5301, TCGA-76-4934, TCGA-76-6193, TCGA-06-5418, TCGA-76-4928, TCGA-12-5299, TCGA-76-6192, TCGA-74-6573, TCGA-06-5410, TCGA-76-4929, TCGA-06-5856, TCGA-06-5412, TCGA-76-4926, TCGA-19-1389, TCGA-76-4925, TCGA-28-5218, TCGA-06-6388, TCGA-06-6390, TCGA-28-6450, TCGA-19-5947, TCGA-06-0210, |                                                                       |                          |                                          |                   |                                                     |              |                   |                  |          |

|                                                                                                                                                          |
|----------------------------------------------------------------------------------------------------------------------------------------------------------|
| TCGA-19-5951, TCGA-06-5411, TCGA-76-6285, TCGA-26-5135, TCGA-76-4931, TCGA-06-0190, TCGA-28-5215, TCGA-28-5207, TCGA-06-5408, TCGA-06-0211, TCGA-14-0740 |
|----------------------------------------------------------------------------------------------------------------------------------------------------------|

127

128 **Sample information.** Cohort: class of patient sample group (LTS; long-term survivor, STS;  
129 short-term survivor), Case No.: case-specific ID, Gender: male or female, Age: age at diagnosis  
130 in years, Diagnosis: histological diagnosis, Survival: survival period between first operation and  
131 death, IDH1 IHC: immunohistochemistry result of IDH1, MGMT MSP: MGMT methylation  
132 specific PCR, PFS: progression free survival, Final status: survival status at the last follow-up.  
133 For TCGA cohort, TCGA patient IDs are provided for reference. N.A. means “not available”.

134

135

136

137

138

139

140

141

142

143

144 **Supplementary table 2 The list of 161,794 significant sites showing the DNA**  
145 **methylation difference between LTS and STS.** This is provided as a separate file (additional  
146 file 2) due to its size. The file includes the following information on the sites: 450K bead array ID  
147 (“ProbeID”), Chromosome (“Chrom”), Coordinate (“Coord”), Gene name (“Gene”), CGI category  
148 of a site (“CGI\_group”), TSS category of a site (“Gene\_group”), Average DNA methylation level  
149 in discovery STS samples (“STS\_Mean”), Average DNA methylation level in discovery LTS  
150 samples (“LTS\_Mean”). The genomic coordinate is based on UCSC hg19.

151

152

153

154

155

156

157

158

159

160

161

162

163 **Supplementary table 3**

| ID         | Description                                                                                                                                                                                                                                            | Number of genes<br>(intersection/ total) | Significance<br>(p-value, FDR) |
|------------|--------------------------------------------------------------------------------------------------------------------------------------------------------------------------------------------------------------------------------------------------------|------------------------------------------|--------------------------------|
| GO:0002250 | An immune response mediated by cells expressing specific receptors for antigen produced through a somatic diversification process, and allowing for an enhanced secondary response to subsequent exposures to the same antigen (immunological memory). | 72 / 100                                 | 0, 0                           |
| GO:0050911 | The series of events involved in the perception of smell in which an olfactory chemical stimulus is received and converted into a molecular signal.                                                                                                    | 135 / 302                                | 0, 0                           |
| GO:0007031 | A process that is carried out at the cellular level which results in the assembly, arrangement of constituent parts, or disassembly of a peroxisome. A peroxisome is a small, membrane-bounded                                                         | 9 / 10                                   | 0.001, 0.051                   |

|  |                                                                 |  |  |
|--|-----------------------------------------------------------------|--|--|
|  | organelle that uses dioxygen (O2) to oxidize organic molecules. |  |  |
|--|-----------------------------------------------------------------|--|--|

164 **Gene Ontology (GO) results of the hypo-methylated sites.** No: number, ID: GO ID,  
165 Description: GO Term description, Number of genes: “total” is the number of genes that are  
166 mapped in the 450K bead array in the GO term, “intersection” means the number of genes that  
167 have associations with the selected hyper-methylated sites, Significance: “p-value” was  
168 obtained from permutation test, “FDR” is False Discovery Rate.

169

170
