# Supplementary material for: Integrative analysis of DNA methylation suggests down-regulation of oncogenic pathways and reduced somatic mutation rates in survival outliers of glioblastoma
Source: Acta Neuropathol Commun. 2019 Jun 3;7:5. doi: 10.1186/s40478-019-0744-0 (PMC6545689; doi:10.1186/s40478-019-0744-0)
Supplement: Supplementary file 2 — : Table S2. The list of 161,794 significant sites showing the DNA 145 methylationdifference between LTS and STS. (CSV 8954 kb) [file 40478_2019_744_MOESM2_ESM.csv]

ProbeID	Chrom	Coord	Gene	CGI_group	Gene_group	STS_Mean	LTS_Mean
cg15174812	chr1	566172		OpenSea	intergenic	0.14	0.093
cg08477687	chr1	566570	MIR1977	OpenSea	intergenic	0.26	0.15
cg00034556	chr1	566731	MIR1977	OpenSea	downstream	0.29	0.14
cg00645010	chr1	567113	MIR1977	OpenSea	downstream	0.063	0.044
cg15394630	chr1	567206	MIR1977	OpenSea	downstream	0.17	0.085
cg05001044	chr1	567312	MIR1977	OpenSea	downstream	0.12	0.073
cg03344490	chr1	567348	MIR1977	OpenSea	downstream	0.14	0.057
cg17501828	chr1	567358	MIR1977	OpenSea	downstream	0.24	0.13
cg23917638	chr1	567501	MIR1977	OpenSea	downstream	0.25	0.13
cg18761878	chr1	568475		OpenSea	upstream	0.42	0.23
cg08858441	chr1	569427		OpenSea	intergenic	0.41	0.14
cg17505339	chr1	720865		OpenSea	intergenic	0.93	0.79
cg16736630	chr1	779995	LOC643837	OpenSea	ncRNA	0.87	0.54
cg01793617	chr1	785628	LOC643837	Shelf	ncRNA	0.61	0.8
cg08258224	chr1	800083		Shore	intergenic	0.56	0.62
cg08128007	chr1	839435		Shore	intergenic	0.62	0.78
cg13371836	chr1	840274		Island	intergenic	0.024	0.063
cg04407431	chr1	840618		Island	intergenic	0.0063	0.053
cg13565718	chr1	841289		Shore	intergenic	0.89	0.64
cg08900511	chr1	843581		Shore	intergenic	0.71	0.8
cg18762746	chr1	845278		Island	intergenic	0.87	0.93
cg05151709	chr1	846155		Shore	intergenic	0.42	0.62
cg08546707	chr1	846195		Shore	intergenic	0.45	0.68
cg06154531	chr1	846507		Shore	intergenic	0.52	0.65
cg11851804	chr1	848379		Shelf	intergenic	0.17	0.37
cg21407818	chr1	853925	FLJ39609	Shore	ncRNA	0.71	0.77
cg03725447	chr1	860008	SAMD11	Island	intergenic	0.19	0.53
cg27487046	chr1	860613	SAMD11	Island	upstream	0.0089	0.085
cg03735847	chr1	860925	SAMD11	Island	upstream	0.014	0.058
cg03180780	chr1	860965	SAMD11	Island	upstream	0.028	0.093
cg09166659	chr1	861177	SAMD11	Island	exon	0.028	0.26
cg10711230	chr1	867031	SAMD11	Shelf	intron	0.91	0.61
cg00145911	chr1	867938	SAMD11	Shore	intron	0.83	0.89
cg05819296	chr1	871980	SAMD11	Shore	intron	0.63	0.41
cg13904806	chr1	874697	SAMD11	Shore	exon	0.67	0.81
cg23440882	chr1	875880	SAMD11	Island	intron	0.032	0.15
cg15896339	chr1	876249	SAMD11	Island	intron	0.044	0.15
cg24045482	chr1	876993	SAMD11	Island	intron	0.056	0.15
cg09988062	chr1	877489	SAMD11	Island	intron	0.035	0.15
cg09756115	chr1	879415	SAMD11	Shore	exon	0.69	0.78
cg17153432	chr1	883538	NOC2L	Shelf	exon	0.78	0.57
cg16248916	chr1	886419	NOC2L	Island	intron	0.93	0.95
cg02326551	chr1	892704	NOC2L	Shore	intron	0.92	0.78
cg15684274	chr1	892857	NOC2L	Shore	intron	0.81	0.47
cg16005420	chr1	892914	NOC2L	Shore	intron	0.81	0.54
cg20453388	chr1	892948	NOC2L	Shore	intron	0.94	0.64
cg24664590	chr1	894056	NOC2L	Shore	intron	0.014	0.11
cg08472719	chr1	894108	NOC2L	Shore	intron	0.04	0.1
cg03161767	chr1	894207	NOC2L	Shore	intron	0.019	0.081
cg04485075	chr1	894587	KLHL17	NOC2L	Island	intron	0.027	0.12
cg16389252	chr1	894601	KLHL17	NOC2L	Island	exon	0.013	0.091
cg11132698	chr1	895988	KLHL17	NOC2L	Island	exon	0.045	0.13
cg26866020	chr1	896305	KLHL17	Island	intron	0.025	0.11
cg17505193	chr1	896310	KLHL17	Island	intron	0.036	0.16
cg16968662	chr1	897308	KLHL17	Island	exon	0.75	0.88
cg11084308	chr1	898397	KLHL17	Island	intron	0.92	0.68
cg11246447	chr1	900424	KLHL17	PLEKHN1	Island	exon	0.84	0.95
cg00328058	chr1	901062	PLEKHN1	KLHL17	Island	exon	0.68	0.89
cg12663811	chr1	901685	PLEKHN1	Island	up/downstream	0.59	0.5
cg23596291	chr1	907638	PLEKHN1	Shore	intron	0.5	0.7
cg22348654	chr1	916058	C1orf170	Shelf	exon	0.72	0.6
cg18166741	chr1	916346	C1orf170	Shelf	exon	0.68	0.73
cg15578015	chr1	934409	HES4	Island	exon	0.061	0.11
cg17907238	chr1	934907	HES4	Island	exon	0.053	0.15
cg02397514	chr1	935139	HES4	Island	exon	0.04	0.13
cg12257384	chr1	935456	HES4	Island	exon	0.03	0.13
cg00447632	chr1	935861	HES4	Island	upstream	0.05	0.16
cg27430493	chr1	936091	HES4	Island	upstream	0.078	0.16
cg25066040	chr1	936229	HES4	Island	upstream	0.064	0.13
cg16578267	chr1	937048	HES4	Island	intergenic	0.17	0.32
cg16034521	chr1	939448		Shelf	intergenic	0.78	0.63
cg09364122	chr1	942198		OpenSea	intergenic	0.93	0.63
cg17142931	chr1	942295		OpenSea	intergenic	0.64	0.77
cg20064006	chr1	942329		OpenSea	intergenic	0.84	0.7
cg17006413	chr1	942451		OpenSea	intergenic	0.88	0.69
cg21472517	chr1	942471		OpenSea	intergenic	0.95	0.77
cg08853797	chr1	943431		OpenSea	intergenic	0.86	0.61
cg26155520	chr1	943647		OpenSea	intergenic	0.73	0.36
cg23691733	chr1	944093		OpenSea	intergenic	0.9	0.73
cg04985032	chr1	944439		OpenSea	intergenic	0.9	0.55
cg24004483	chr1	944783		Shelf	intergenic	0.83	0.44
cg23281018	chr1	944789		Shelf	intergenic	0.68	0.47
cg25552017	chr1	945416		Shelf	intergenic	0.54	0.4
cg10984178	chr1	946099		Shelf	intergenic	0.89	0.68
cg13552506	chr1	946444		Shelf	intergenic	0.85	0.66
cg22020633	chr1	946683		Shore	intergenic	0.93	0.66
cg22367159	chr1	947018		Shore	intergenic	0.86	0.59
cg26837773	chr1	947091		Shore	intergenic	0.74	0.58
cg15825373	chr1	947153		Shore	intergenic	0.82	0.32
cg06538872	chr1	947343		Shore	intergenic	0.68	0.78
cg25610492	chr1	948625	ISG15	Shore	upstream	0.085	0.43
cg20022511	chr1	948740	ISG15	Island	upstream	0.021	0.13
cg16526047	chr1	949893	ISG15	Shore	exon	0.51	0.7
cg15153791	chr1	955083	AGRN	Island	upstream	0.033	0.13
cg07008945	chr1	955720	AGRN	Island	exon	0.014	0.1
cg19813362	chr1	956108	AGRN	Island	intron	0.022	0.09
cg00299257	chr1	956217	AGRN	Island	intron	0.02	0.1
cg10046671	chr1	956299	AGRN	Island	intron	0.022	0.098
cg07787977	chr1	962651	AGRN	Shore	intron	0.63	0.66
cg14663984	chr1	969042	AGRN	Island	intron	0.11	0.23
cg16318112	chr1	969254	AGRN	Island	intron	0.24	0.49
cg09248054	chr1	969257	AGRN	Island	intron	0.1	0.32
cg16502826	chr1	970237	AGRN	Island	intron	0.53	0.61
cg18147233	chr1	970294	AGRN	Shore	intron	0.55	0.7
cg25759916	chr1	975667	AGRN	Island	intron	0.18	0.28
cg26222311	chr1	976227	AGRN	Island	exon	0.09	0.18
cg02138082	chr1	978573	AGRN	Island	intron	0.87	0.64
cg07407159	chr1	979484	AGRN	Island	intron	0.92	0.75
cg16657578	chr1	979589	AGRN	Island	exon	0.95	0.64
cg05719911	chr1	980112	AGRN	Island	intron	0.81	0.91
cg14253035	chr1	981566	AGRN	Shore	exon	0.82	0.92
cg12469361	chr1	982189	AGRN	Island	intron	0.9	0.56
cg09792712	chr1	983545	AGRN	Island	exon	0.68	0.81
cg15469001	chr1	983611	AGRN	Island	exon	0.75	0.84
cg06978943	chr1	984992	AGRN	Shore	exon	0.95	0.82
cg13244315	chr1	985393	AGRN	Shore	exon	0.96	0.85
cg04559824	chr1	989224	AGRN	Shore	exon	0.84	0.89
cg12184864	chr1	994498		Island	intergenic	0.081	0.22
cg12647165	chr1	994637		Island	intergenic	0.039	0.17
cg02482614	chr1	995013		Island	intergenic	0.054	0.26
cg01244934	chr1	1003417		Island	intergenic	0.82	0.87
cg18432292	chr1	1003755		Island	intergenic	0.53	0.37
cg08750554	chr1	1005100		Island	intergenic	0.33	0.39
cg27222785	chr1	1008091		Shelf	intron	0.69	0.43
cg00305285	chr1	1017115		Island	downstream	0.77	0.43
cg19758750	chr1	1018479	C1orf159	Shore	intron	0.76	0.86
cg19734301	chr1	1020365	C1orf159	Shore	intron	0.77	0.86
cg05041517	chr1	1021029	C1orf159	Shore	intron	0.6	0.71
cg12743165	chr1	1022995	C1orf159	Shore	intron	0.74	0.82
cg09358422	chr1	1023247	C1orf159	Island	intron	0.97	0.82
cg11144217	chr1	1027520	C1orf159	Island	intron	0.97	0.79
cg10782633	chr1	1027572	C1orf159	Island	intron	0.98	0.94
cg05007472	chr1	1042420	C1orf159	Shelf	intron	0.96	0.73
cg20961824	chr1	1046086	C1orf159	Island	intron	0.53	0.7
cg24709745	chr1	1049864	C1orf159	Shore	intron	0.95	0.74
cg14981312	chr1	1050737	C1orf159	Island	intron	0.048	0.12
cg20945607	chr1	1051537	C1orf159	Island	exon	0.022	0.098
cg15030799	chr1	1052094	C1orf159	Island	upstream	0.018	0.08
cg25973293	chr1	1061647		OpenSea	intergenic	0.7	0.84
cg02838683	chr1	1063857		OpenSea	intergenic	0.79	0.87
cg17094363	chr1	1065864		OpenSea	intergenic	0.88	0.74
cg07179016	chr1	1066277		OpenSea	intergenic	0.71	0.61
cg07203151	chr1	1066544		OpenSea	intergenic	0.77	0.63
cg11750929	chr1	1067099		OpenSea	intergenic	0.84	0.56
cg01776299	chr1	1067163		OpenSea	intergenic	0.93	0.82
cg09032281	chr1	1067397		OpenSea	intergenic	0.81	0.52
cg13361271	chr1	1070325		Shelf	intergenic	0.68	0.82
cg00812770	chr1	1073510		Shore	ncRNA	0.89	0.68
cg16254267	chr1	1073529		Shore	ncRNA	0.81	0.49
cg12274407	chr1	1074226		Shore	ncRNA	0.85	0.47
cg12658052	chr1	1078295		OpenSea	ncRNA	0.53	0.79
cg12755103	chr1	1078519		OpenSea	ncRNA	0.91	0.8
cg19708306	chr1	1078901		OpenSea	ncRNA	0.72	0.51
cg24158844	chr1	1079561		OpenSea	downstream	0.63	0.42
cg25772221	chr1	1079622		OpenSea	downstream	0.59	0.34
cg25340711	chr1	1080611		OpenSea	intergenic	0.92	0.67
cg03228985	chr1	1083642		OpenSea	intergenic	0.89	0.51
cg04311266	chr1	1086777		OpenSea	intergenic	0.81	0.59
cg05929553	chr1	1086836		OpenSea	intergenic	0.9	0.65
cg10399850	chr1	1089668		Shelf	intergenic	0.84	0.64
cg15988843	chr1	1092940		Shore	intergenic	0.09	0.22
cg14288281	chr1	1093457		Island	intergenic	0.18	0.29
cg02971920	chr1	1095607		Shelf	intergenic	0.9	0.62
cg06767191	chr1	1095737		Shelf	intergenic	0.92	0.83
cg10335452	chr1	1097027		Shore	intergenic	0.82	0.62
cg00082285	chr1	1097270		Shore	intergenic	0.68	0.85
cg00207921	chr1	1098992		Island	intergenic	0.83	0.6
cg20544808	chr1	1099051		Island	intergenic	0.88	0.68
cg18792131	chr1	1099166		Island	intergenic	0.96	0.74
cg20185617	chr1	1099651		Island	intergenic	0.52	0.31
cg15414773	chr1	1100360		Island	intergenic	0.67	0.39
cg21475076	chr1	1100493		Island	intergenic	0.93	0.72
cg13449535	chr1	1101348	MIR200B	Shore	intergenic	0.65	0.3
cg03003746	chr1	1102833	MIR200A	Shelf	up/downstream	0.96	0.85
cg13362546	chr1	1102960	MIR200A	MIR429	Shelf	up/downstream	0.71	0.49
cg21810793	chr1	1103225	MIR200A	MIR429	Shelf	up/downstream	0.74	0.7
cg25101291	chr1	1103235	MIR200A	MIR429	Shelf	up/downstream	0.74	0.63
cg26910384	chr1	1103312	MIR200A	MIR429	Shelf	ncRNA	0.7	0.82
cg00152708	chr1	1104316	MIR429	Shelf	up/downstream	0.73	0.5
cg18348086	chr1	1104526		Shelf	downstream	0.66	0.52
cg03278726	chr1	1109832	TTLL10	Island	exon	0.66	0.82
cg18382926	chr1	1113624	TTLL10	Shore	intron	0.74	0.59
cg07841371	chr1	1114912	TTLL10	Shore	intron	0.84	0.59
cg24884961	chr1	1115083	TTLL10	Shore	exon	0.78	0.53
cg16366262	chr1	1118157	TTLL10	Shelf	intron	0.83	0.54
cg08886036	chr1	1118934	TTLL10	Shelf	intron	0.87	0.66
cg06440474	chr1	1118965	TTLL10	Shelf	intron	0.85	0.55
cg05652547	chr1	1131983	TTLL10	Shore	exon	0.83	0.91
cg13089299	chr1	1133550		Shore	downstream	0.79	0.56
cg05952202	chr1	1136401		Island	intergenic	0.084	0.28
cg04172501	chr1	1136430		Island	intergenic	0.1	0.21
cg22696995	chr1	1136667		Island	intergenic	0.055	0.14
cg08090128	chr1	1140044	TNFRSF18	Shore	intron	0.81	0.53
cg19092396	chr1	1143751		Shore	intergenic	0.36	0.27
cg21815220	chr1	1150410	TNFRSF4	Shore	upstream	0.57	0.64
cg17084044	chr1	1150416	TNFRSF4	Shore	upstream	0.73	0.79
cg16252905	chr1	1150936	TNFRSF4	Shore	intergenic	0.7	0.79
cg26312965	chr1	1152547	SDF4	Island	exon	0.88	0.53
cg03580801	chr1	1153690	SDF4	Shore	intron	0.82	0.9
cg19862782	chr1	1153924	SDF4	Island	exon	0.62	0.87
cg11727921	chr1	1154318	SDF4	Island	intron	0.88	0.88
cg09276842	chr1	1155026	SDF4	Shore	intron	0.96	0.78
cg07548512	chr1	1155472	SDF4	Shore	intron	0.98	0.83
cg05818515	chr1	1158081	SDF4	Shore	intron	0.86	0.9
cg23082845	chr1	1159282	SDF4	Island	exon	0.93	0.73
cg20300707	chr1	1162156	SDF4	Island	intron	0.83	0.6
cg20014591	chr1	1165393	SDF4	Shore	intron	0.92	0.72
cg02224920	chr1	1166824	SDF4	B3GALT6	Shore	intron	0.035	0.073
cg18387017	chr1	1167389	SDF4	B3GALT6	Island	exon	0.018	0.12
cg19945840	chr1	1168036	SDF4	B3GALT6	Island	exon	0.65	0.69
cg22220310	chr1	1168541	SDF4	B3GALT6	Island	exon	0.97	0.87
cg14477263	chr1	1168550	SDF4	B3GALT6	Island	exon	0.95	0.85
cg07810204	chr1	1169394	B3GALT6	Shore	exon	0.93	0.53
cg07146103	chr1	1170069	B3GALT6	Shore	exon	0.75	0.88
cg10784110	chr1	1173356		Shore	intergenic	0.42	0.51
cg06964912	chr1	1173622		Shore	intergenic	0.14	0.095
cg07719599	chr1	1177886	FAM132A	Island	exon	0.73	0.85
cg00211609	chr1	1178039	FAM132A	Island	intron	0.44	0.61
cg02279987	chr1	1181757	FAM132A	Island	intron	0.39	0.54
cg25594899	chr1	1182226	FAM132A	Island	upstream	0.072	0.16
cg14089984	chr1	1182418	FAM132A	Island	upstream	0.078	0.21
cg06443533	chr1	1182424	FAM132A	Island	upstream	0.098	0.23
cg26314055	chr1	1182658	FAM132A	Shore	upstream	0.12	0.21
cg20747739	chr1	1183257	FAM132A	Shore	intergenic	0.49	0.72
cg13440692	chr1	1186357		Shelf	intergenic	0.75	0.8
cg19869091	chr1	1188173		Shore	intergenic	0.85	0.5
cg08643618	chr1	1189466	UBE2J2	Island	exon	0.98	0.84
cg06361835	chr1	1189797	UBE2J2	Island	exon	0.85	0.92
cg22699977	chr1	1193746	UBE2J2	LOC100128842	Shelf	intron	0.78	0.64
cg03525583	chr1	1197536	UBE2J2	LOC100128842	OpenSea	intron	0.97	0.86
cg02386723	chr1	1203167	UBE2J2	Island	exon	0.82	0.85
cg19816994	chr1	1203436	UBE2J2	Island	intron	0.93	0.7
cg02859098	chr1	1203564	UBE2J2	Island	intron	0.9	0.66
cg22009470	chr1	1203660	UBE2J2	Shore	intron	0.96	0.8
cg16717690	chr1	1208709	UBE2J2	Island	intron	0.028	0.17
cg02581421	chr1	1209196	UBE2J2	Island	exon	0.026	0.07
cg00942814	chr1	1214601		OpenSea	intergenic	0.86	0.57
cg19861048	chr1	1216347	SCNN1D	OpenSea	intron	0.84	0.87
cg22421766	chr1	1217658	SCNN1D	OpenSea	exon	0.2	0.17
cg24576260	chr1	1217664	SCNN1D	OpenSea	exon	0.35	0.32
cg22225577	chr1	1221823	SCNN1D	OpenSea	intron	0.61	0.77
cg16995668	chr1	1222895	SCNN1D	OpenSea	exon	0.67	0.81
cg15994839	chr1	1228289	ACAP3	Shore	exon	0.74	0.8
cg09439264	chr1	1230073	ACAP3	Island	intron	0.69	0.75
cg19414302	chr1	1234354	ACAP3	OpenSea	intron	0.37	0.64
cg06759632	chr1	1235430	ACAP3	OpenSea	exon	0.58	0.73
cg26333156	chr1	1242730	PUSL1	ACAP3	Island	intron	0.022	0.1
cg00262415	chr1	1242732	PUSL1	ACAP3	Island	intron	0.012	0.095
cg00086266	chr1	1242895	PUSL1	ACAP3	Island	intron	0.04	0.2
cg06984883	chr1	1243564	PUSL1	ACAP3	Island	upstream	0.012	0.04
cg04840417	chr1	1243573	PUSL1	ACAP3	Island	upstream	0.019	0.08
cg05724097	chr1	1245708	PUSL1	Shore	intron	0.71	0.82
cg26369180	chr1	1246414	PUSL1	Shore	exon	0.8	0.92
cg17709975	chr1	1248492	CPSF3L	Island	exon	0.66	0.8
cg16527939	chr1	1253970	CPSF3L	Shore	intron	0.45	0.33
cg21197375	chr1	1259676	GLTPD1	CPSF3L	Island	intron	0.074	0.13
cg20236831	chr1	1259679	GLTPD1	CPSF3L	Island	intron	0.029	0.083
cg04232698	chr1	1260157	GLTPD1	CPSF3L	Island	exon	0.21	0.41
cg16255279	chr1	1262717	GLTPD1	Island	exon	0.93	0.96
cg16432326	chr1	1263095	GLTPD1	Island	exon	0.7	0.87
cg04910752	chr1	1267117	TAS1R3	Island	exon	0.52	0.63
cg08621441	chr1	1267745	TAS1R3	Island	exon	0.6	0.8
cg18386618	chr1	1268144	TAS1R3	Island	exon	0.66	0.81
cg00002593	chr1	1268793	TAS1R3	Island	intron	0.61	0.73
cg11808871	chr1	1268942	TAS1R3	Island	exon	0.51	0.68
cg06646682	chr1	1273442	DVL1	Shore	exon	0.82	0.51
cg12072393	chr1	1273707	DVL1	Shore	exon	0.87	0.95
cg13494355	chr1	1274420	DVL1	Shore	intron	0.87	0.6
cg22376366	chr1	1275137	DVL1	Shelf	exon	0.97	0.84
cg25203539	chr1	1275578	DVL1	Shelf	intron	0.89	0.91
cg17748182	chr1	1277441	DVL1	OpenSea	exon	0.8	0.91
cg17838754	chr1	1281005	DVL1	Shelf	intron	0.84	0.71
cg04119843	chr1	1284268	DVL1	Island	intron	0.065	0.074
cg10164137	chr1	1285239	DVL1	Island	upstream	0.016	0.12
cg11414742	chr1	1288586	MXRA8	Shore	exon	0.36	0.51
cg07284273	chr1	1290212	MXRA8	Island	exon	0.47	0.57
cg17132079	chr1	1294140	MXRA8	Shelf	exon	0.55	0.63
cg20426768	chr1	1296671		OpenSea	exon	0.68	0.79
cg24153574	chr1	1296956		OpenSea	exon	0.54	0.73
cg03400623	chr1	1297240		OpenSea	intron	0.6	0.73
cg22109675	chr1	1297567		OpenSea	intron	0.27	0.51
cg15604233	chr1	1310715	AURKAIP1	Island	exon	0.03	0.087
cg11518257	chr1	1310775	AURKAIP1	Island	exon	0.028	0.12
cg15617543	chr1	1310978	AURKAIP1	Island	upstream	0.014	0.077
cg16361266	chr1	1313144		Shelf	intergenic	0.92	0.76
cg12033178	chr1	1321869	CCNL2	Shore	exon	0.96	0.71
cg08158776	chr1	1321914	CCNL2	Shore	exon	0.95	0.84
cg15588177	chr1	1322654	CCNL2	Island	exon	0.97	0.79
cg01006034	chr1	1322789	CCNL2	Island	exon	0.94	0.79
cg17014728	chr1	1327484	CCNL2	OpenSea	intron	0.91	0.65
cg22389936	chr1	1328033	CCNL2	OpenSea	exon	0.94	0.82
cg04481810	chr1	1329036	CCNL2	OpenSea	intron	0.72	0.85
cg19384072	chr1	1329044	CCNL2	OpenSea	intron	0.62	0.78
cg11811184	chr1	1331803	CCNL2	Shelf	intron	0.93	0.77
cg13053783	chr1	1334803	CCNL2	LOC148413	Island	upstream	0.017	0.12
cg23437836	chr1	1335601	CCNL2	LOC148413	Island	ncRNA	0.052	0.045
cg09064061	chr1	1336592	LOC148413	Shore	ncRNA	0.54	0.73
cg24399028	chr1	1338100	MRPL20	Shelf	intron	0.92	0.73
cg14795268	chr1	1341852	MRPL20	Shore	intron	0.1	0.2
cg21439539	chr1	1342230	MRPL20	Island	intron	0.017	0.051
cg11993086	chr1	1342795	MRPL20	Island	upstream	0.015	0.093
cg04230662	chr1	1343134	MRPL20	Shore	upstream	0.078	0.043
cg11222665	chr1	1343355	MRPL20	Shore	upstream	0.13	0.21
cg16661858	chr1	1345158		Shelf	intergenic	0.93	0.71
cg15823872	chr1	1357361	LOC441869	Shore	upstream	0.86	0.52
cg17142722	chr1	1363280		Island	downstream	0.028	0.16
cg04897188	chr1	1363291		Island	downstream	0.044	0.2
cg12407057	chr1	1366206		Shelf	ncRNA	0.44	0.59
cg09843049	chr1	1373316	VWA1	Shore	intron	0.76	0.8
cg09603935	chr1	1375448	VWA1	Island	exon	0.94	0.8
cg08270205	chr1	1377525	VWA1	Shore	exon	0.6	0.78
cg15099879	chr1	1377656	VWA1	Shelf	exon	0.76	0.87
cg06786804	chr1	1377938	VWA1	Shelf	exon	0.62	0.57
cg24492273	chr1	1378060	VWA1	Shelf	exon	0.89	0.94
cg18148498	chr1	1380621		OpenSea	intergenic	0.58	0.39
cg11405695	chr1	1384091	ATAD3C	OpenSea	upstream	0.84	0.73
cg02136596	chr1	1384930	ATAD3C	OpenSea	upstream	0.81	0.44
cg00528453	chr1	1385171	ATAD3C	OpenSea	exon	0.9	0.68
cg13969072	chr1	1385577	ATAD3C	Shelf	exon	0.82	0.71
cg26182712	chr1	1387256	ATAD3C	Shelf	intron	0.88	0.67
cg26651722	chr1	1389888	ATAD3C	Island	intron	0.81	0.63
cg26226110	chr1	1395945	ATAD3C	Shore	intron	0.74	0.5
cg25210378	chr1	1406663	ATAD3B	Shore	upstream	0.085	0.2
cg15875062	chr1	1406845	ATAD3B	Island	upstream	0.0094	0.085
cg10228629	chr1	1406955	ATAD3B	Island	upstream	0.034	0.18
cg06377929	chr1	1407001	ATAD3B	Island	upstream	0.11	0.26
cg10240778	chr1	1407180	ATAD3B	Island	exon	0.015	0.078
cg04286729	chr1	1407183	ATAD3B	Island	exon	0.021	0.075
cg12439834	chr1	1410849	ATAD3B	Shelf	intron	0.75	0.38
cg22225258	chr1	1447235	ATAD3A	Island	upstream	0.024	0.091
cg14395520	chr1	1459028	ATAD3A	Island	intron	0.81	0.88
cg27301475	chr1	1472146	C1orf70	Shore	intron	0.55	0.68
cg02068237	chr1	1473319	C1orf70	Island	intron	0.7	0.88
cg03724010	chr1	1473443	C1orf70	Shore	intron	0.9	0.94
cg00813378	chr1	1475209	C1orf70	Island	intron	0.1	0.22
cg22497741	chr1	1475644	C1orf70	Shore	intron	0.044	0.11
cg15487867	chr1	1475742	C1orf70	Shore	upstream	0.032	0.1
cg18114463	chr1	1476551	C1orf70	Island	up/downstream	0.79	0.86
cg09612202	chr1	1476661	C1orf70	Island	up/downstream	0.7	0.82
cg11811409	chr1	1477025	C1orf70	Shore	downstream	0.69	0.72
cg26690297	chr1	1477098	SSU72	C1orf70	Shore	exon	0.79	0.88
cg19619320	chr1	1477931	SSU72	Shore	intron	0.7	0.78
cg00355315	chr1	1483257	SSU72	OpenSea	intron	0.97	0.8
cg12734710	chr1	1486459	SSU72	Shelf	intron	0.32	0.5
cg16305094	chr1	1487266	SSU72	Shelf	intron	0.86	0.58
cg07229301	chr1	1487445	SSU72	Shelf	intron	0.74	0.87
cg22373622	chr1	1489544	SSU72	Island	intron	0.83	0.58
cg26908276	chr1	1489793	SSU72	Island	intron	0.94	0.82
cg09073059	chr1	1490216	SSU72	Shore	intron	0.89	0.7
cg16277776	chr1	1490676	SSU72	Shore	intron	0.7	0.83
cg07211239	chr1	1490809	SSU72	Shore	intron	0.38	0.57
cg09517190	chr1	1492513	SSU72	Shelf	intron	0.96	0.79
cg12062537	chr1	1496856	SSU72	Island	intron	0.95	0.96
cg13431342	chr1	1500958	SSU72	Shelf	intron	0.93	0.62
cg12690016	chr1	1507138	SSU72	Shelf	intron	0.98	0.81
cg13424097	chr1	1510427	SSU72	Island	upstream	0.025	0.095
cg06199750	chr1	1510566	SSU72	Island	upstream	0.064	0.28
cg00151676	chr1	1525452		OpenSea	intergenic	0.96	0.87
cg07479014	chr1	1534392		Island	exon	0.77	0.81
cg09172260	chr1	1536101		Island	upstream	0.56	0.72
cg11649182	chr1	1539923		Shelf	intergenic	0.69	0.56
cg15652741	chr1	1550479	MIB2	Island	upstream	0.023	0.14
cg10705488	chr1	1550648	MIB2	Island	upstream	0.017	0.05
cg01589461	chr1	1558622	MIB2	Island	intron	0.64	0.72
cg17456675	chr1	1560531	MIB2	Shore	exon	0.75	0.88
cg22689324	chr1	1562397	MIB2	Island	intron	0.85	0.68
cg00297832	chr1	1565541	MIB2	Island	intron	0.82	0.45
cg08231710	chr1	1566687	MMP23A	MMP23B	Island	up/downstream	0.26	0.44
cg06943420	chr1	1566699	MMP23A	MMP23B	Island	up/downstream	0.13	0.32
cg11648594	chr1	1566860	MMP23A	MMP23B	Island	up/downstream	0.27	0.51
cg15126211	chr1	1590291	CDK11B	Island	intron	0.022	0.16
cg18282011	chr1	1590447	CDK11B	Island	intron	0.027	0.059
cg21149807	chr1	1590459	CDK11B	Island	intron	0.022	0.095
cg09283376	chr1	1590479	CDK11B	Island	intron	0.04	0.1
cg04105726	chr1	1601205	LOC728661	CDK11B	Island	intron	0.92	0.58
cg00400654	chr1	1604298	LOC728661	CDK11B	Shore	intron	0.88	0.66
cg02915803	chr1	1606292	LOC728661	CDK11B	Shore	intron	0.91	0.71
cg20251225	chr1	1609551	CDK11B	LOC728661	Shore	intron	0.79	0.76
cg01189072	chr1	1610660	CDK11B	LOC728661	Shelf	intron	0.94	0.84
cg11588584	chr1	1611937	CDK11B	LOC728661	Shelf	intron	0.72	0.91
cg20462449	chr1	1613704	CDK11B	LOC728661	OpenSea	intron	0.82	0.51
cg14976190	chr1	1615736	CDK11B	LOC728661	OpenSea	intron	0.97	0.78
cg23231093	chr1	1625702	LOC728661	CDK11B	Shore	intron	0.64	0.27
cg21265770	chr1	1631037	MMP23A	CDK11B	Shore	intron	0.73	0.4
cg21932190	chr1	1635647	CDK11A	CDK11B	Shore	intron	0.87	0.91
cg11198222	chr1	1655838	CDK11B	CDK11A	Island	exon	0.0077	0.045
cg27391816	chr1	1672644	SLC35E2	Shore	intron	0.79	0.4
cg16990280	chr1	1674679	SLC35E2	Shelf	intron	0.82	0.39
cg22442180	chr1	1684399	NADK	Shore	exon	0.65	0.73
cg21580588	chr1	1685723	NADK	Island	exon	0.96	0.79
cg15260978	chr1	1685832	NADK	Island	intron	0.77	0.84
cg26342907	chr1	1687532	NADK	Shore	intron	0.96	0.82
cg11725331	chr1	1687729	NADK	Shore	exon	0.91	0.74
cg03606098	chr1	1690840	NADK	Shore	intron	0.7	0.73
cg14778560	chr1	1693368	NADK	Shore	intron	0.84	0.66
cg15824543	chr1	1695391	NADK	Shelf	intron	0.85	0.74
cg06219660	chr1	1695509	NADK	Shelf	intron	0.67	0.52
cg00992048	chr1	1695585	NADK	Shelf	intron	0.62	0.45
cg09182189	chr1	1709203	NADK	Shore	intron	0.063	0.21
cg10388316	chr1	1710208	NADK	Island	exon	0.027	0.19
cg02280859	chr1	1711185	NADK	Shore	intron	0.56	0.31
cg24163210	chr1	1713944		Island	intergenic	0.4	0.43
cg00558749	chr1	1713950		Island	intergenic	0.42	0.44
cg22376730	chr1	1715039		Shore	intergenic	0.79	0.88
cg04902899	chr1	1717822	GNB1	Shelf	exon	0.92	0.78
cg26793463	chr1	1735887	GNB1	OpenSea	exon	0.94	0.75
cg21422400	chr1	1747243	GNB1	OpenSea	exon	0.69	0.79
cg16677144	chr1	1790217	GNB1	OpenSea	intron	0.068	0.15
cg20801637	chr1	1795408	GNB1	OpenSea	intron	0.86	0.38
cg19340909	chr1	1821422	GNB1	Island	intron	0.041	0.095
cg03716942	chr1	1821981	GNB1	Island	intron	0.027	0.11
cg06196161	chr1	1822066	GNB1	Island	intron	0.023	0.11
cg01821754	chr1	1822399	GNB1	Island	exon	0.074	0.2
cg04266169	chr1	1822862	GNB1	Island	upstream	0.023	0.12
cg26160180	chr1	1822883	GNB1	Island	upstream	0.029	0.16
cg23936745	chr1	1837873		Shelf	intergenic	0.07	0.26
cg13918235	chr1	1840201		Island	intergenic	0.022	0.074
cg00309462	chr1	1840482		Island	intergenic	0.02	0.073
cg23688809	chr1	1840730		Shore	intergenic	0.047	0.25
cg15102821	chr1	1844801	CALML6	OpenSea	intergenic	0.55	0.46
cg15819352	chr1	1845940	CALML6	OpenSea	upstream	0.58	0.27
cg10219957	chr1	1851416	TMEM52	Shore	upstream	0.79	0.9
cg22536775	chr1	1851439	TMEM52	Shore	upstream	0.53	0.66
cg06174563	chr1	1851910	TMEM52	Shore	intergenic	0.8	0.91
cg18231054	chr1	1858037		Shore	intron	0.81	0.52
cg06092084	chr1	1858106		Shore	exon	0.65	0.82
cg11649821	chr1	1859438		Island	intron	0.78	0.6
cg06853697	chr1	1868638		OpenSea	intron	0.71	0.47
cg18383977	chr1	1870495		OpenSea	intron	0.85	0.65
cg02367828	chr1	1872033		Shelf	intron	0.72	0.45
cg14839558	chr1	1874488		Shore	intron	0.87	0.52
cg21876832	chr1	1874742		Island	intron	0.86	0.72
cg22375575	chr1	1877730		Shore	intron	0.96	0.74
cg22452682	chr1	1882619		Shelf	intron	0.92	0.41
cg22380385	chr1	1885948	KIAA1751	Shore	intron	0.86	0.56
cg05264578	chr1	1886865	KIAA1751	Island	intron	0.86	0.64
cg12665890	chr1	1888447	KIAA1751	Shore	intron	0.8	0.75
cg03950120	chr1	1889924	KIAA1751	Shelf	intron	0.71	0.49
cg11528033	chr1	1890152	KIAA1751	Shelf	intron	0.9	0.65
cg11956108	chr1	1895061	KIAA1751	Shore	intron	0.86	0.75
cg04395167	chr1	1895110	KIAA1751	Shore	intron	0.73	0.71
cg05757448	chr1	1895206	KIAA1751	Shore	exon	0.8	0.72
cg15151929	chr1	1896429	KIAA1751	Island	exon	0.88	0.62
cg15546282	chr1	1903425	KIAA1751	OpenSea	exon	0.98	0.81
cg06835814	chr1	1905080	KIAA1751	OpenSea	intron	0.55	0.35
cg07105421	chr1	1905575	KIAA1751	OpenSea	exon	0.9	0.76
cg01559650	chr1	1907395	KIAA1751	Shelf	intron	0.77	0.48
cg05035280	chr1	1909092	KIAA1751	Shore	intron	0.57	0.52
cg03688085	chr1	1910585	KIAA1751	Island	intron	0.8	0.63
cg01748832	chr1	1911471	KIAA1751	Island	intron	0.96	0.76
cg26801936	chr1	1916344	KIAA1751	Shelf	intron	0.74	0.7
cg10331922	chr1	1916718	KIAA1751	Shelf	intron	0.94	0.75
cg26424079	chr1	1932335	KIAA1751	Shelf	intron	0.96	0.9
cg22344830	chr1	1935048	KIAA1751	Shore	intron	0.046	0.17
cg11983992	chr1	1938655		Shelf	intergenic	0.89	0.66
cg09107007	chr1	1950616	GABRD	Island	upstream	0.12	0.19
cg11808581	chr1	1950725	GABRD	Island	upstream	0.078	0.25
cg04847273	chr1	1957620	GABRD	Shore	intron	0.49	0.27
cg00889627	chr1	1959630	GABRD	Island	exon	0.85	0.91
cg26903053	chr1	1959813	GABRD	Island	intron	0.76	0.49
cg25384089	chr1	1961628	GABRD	Island	exon	0.94	0.87
cg24547253	chr1	1962082	GABRD	Shore	exon	0.75	0.54
cg13856872	chr1	1965063		Shelf	intergenic	0.83	0.68
cg16650026	chr1	1969334		OpenSea	intergenic	0.95	0.78
cg04843461	chr1	1974661		Shore	intergenic	0.63	0.83
cg15356494	chr1	1974941		Island	intergenic	0.72	0.53
cg01907016	chr1	1985500	PRKCZ	Shelf	intron	0.95	0.78
cg08484080	chr1	1986139	PRKCZ	Shelf	intron	0.8	0.58
cg12391964	chr1	1986275	PRKCZ	Shelf	intron	0.9	0.77
cg23629792	chr1	1987129	PRKCZ	Shelf	intron	0.9	0.47
cg06340969	chr1	1990780	PRKCZ	Island	intron	0.98	0.79
cg08115172	chr1	1990868	PRKCZ	Island	intron	0.92	0.84
cg00653281	chr1	1991051	PRKCZ	Island	intron	0.89	0.8
cg04871460	chr1	1991521	PRKCZ	Shore	intron	0.33	0.54
cg05463656	chr1	1992687	PRKCZ	Shore	intron	0.94	0.74
cg00328210	chr1	1993016	PRKCZ	Shore	intron	0.87	0.65
cg03734700	chr1	1999046	PRKCZ	OpenSea	intron	0.9	0.72
cg21221161	chr1	1999183	PRKCZ	OpenSea	intron	0.92	0.82
cg22332100	chr1	2000508	PRKCZ	OpenSea	intron	0.98	0.81
cg11699150	chr1	2002329	PRKCZ	Shelf	intron	0.85	0.8
cg15115072	chr1	2002722	PRKCZ	Shelf	intron	0.76	0.59
cg17815669	chr1	2003198	PRKCZ	Shore	intron	0.94	0.75
cg16269144	chr1	2003326	PRKCZ	Shore	intron	0.95	0.67
cg22332339	chr1	2003605	PRKCZ	Shore	intron	0.84	0.67
cg00095688	chr1	2003864	PRKCZ	Shore	intron	0.82	0.58
cg24842354	chr1	2004057	PRKCZ	Shore	intron	0.64	0.42
cg13077150	chr1	2004222	PRKCZ	Shore	intron	0.86	0.62
cg00359465	chr1	2004346	PRKCZ	Shore	intron	0.7	0.83
cg03959306	chr1	2004968	PRKCZ	Shore	intron	0.39	0.6
cg06757383	chr1	2008579	PRKCZ	Shelf	intron	0.92	0.83
cg14599857	chr1	2010959	PRKCZ	OpenSea	intron	0.98	0.87
cg11835265	chr1	2011913	PRKCZ	OpenSea	intron	0.96	0.73
cg26252027	chr1	2012218	PRKCZ	OpenSea	intron	0.76	0.41
cg08000672	chr1	2012434	PRKCZ	OpenSea	intron	0.92	0.79
cg07375700	chr1	2013507	PRKCZ	OpenSea	intron	0.76	0.92
cg16059943	chr1	2013748	PRKCZ	OpenSea	intron	0.61	0.82
cg23820589	chr1	2014244	PRKCZ	OpenSea	intron	0.86	0.53
cg12085265	chr1	2014628	PRKCZ	OpenSea	intron	0.74	0.62
cg22868225	chr1	2015815	PRKCZ	OpenSea	intron	0.93	0.82
cg08659047	chr1	2022951	PRKCZ	Shelf	intron	0.71	0.48
cg19906777	chr1	2023482	PRKCZ	Shore	intron	0.43	0.63
cg01164686	chr1	2024593	PRKCZ	Shore	intron	0.89	0.72
cg02300356	chr1	2027983	PRKCZ	Shore	intron	0.94	0.76
cg19646139	chr1	2029012	PRKCZ	Shelf	intron	0.93	0.8
cg02912476	chr1	2035087	PRKCZ	Shelf	intron	0.9	0.69
cg08651178	chr1	2035295	PRKCZ	Shelf	intron	0.93	0.8
cg23276504	chr1	2035462	PRKCZ	Shelf	intron	0.82	0.47
cg06315149	chr1	2036398	PRKCZ	Shelf	intron	0.85	0.65
cg09322616	chr1	2040400	PRKCZ	Shore	intron	0.66	0.31
cg11781622	chr1	2041072	PRKCZ	Island	intron	0.87	0.75
cg25319188	chr1	2041103	PRKCZ	Island	intron	0.96	0.85
cg22876683	chr1	2043450	PRKCZ	Shelf	intron	0.95	0.79
cg13918804	chr1	2043761	PRKCZ	Shelf	intron	0.71	0.55
cg03599988	chr1	2045413	PRKCZ	Shore	intron	0.89	0.62
cg03777518	chr1	2045682	PRKCZ	Shore	intron	0.89	0.65
cg26910870	chr1	2046928	PRKCZ	Shore	intron	0.68	0.45
cg20328379	chr1	2048946	PRKCZ	Shelf	intron	0.9	0.82
cg23803603	chr1	2058230	PRKCZ	OpenSea	intron	0.81	0.83
cg00443516	chr1	2061836	PRKCZ	Shore	intron	0.86	0.64
cg25466090	chr1	2064691	PRKCZ	Island	intron	0.098	0.28
cg22366001	chr1	2066006	PRKCZ	Shore	intron	0.65	0.87
cg26930596	chr1	2082315	PRKCZ	Island	exon	0.85	0.64
cg01974180	chr1	2084246	PRKCZ	Shore	intron	0.94	0.87
cg07382156	chr1	2085526	PRKCZ	Shelf	intron	0.88	0.6
cg14989962	chr1	2085717	PRKCZ	Shelf	intron	0.96	0.83
cg24054683	chr1	2085751	PRKCZ	Shelf	intron	0.82	0.48
cg16813816	chr1	2091066	PRKCZ	OpenSea	intron	0.89	0.73
cg24604214	chr1	2092394	PRKCZ	OpenSea	intron	0.88	0.51
cg09260853	chr1	2094483	PRKCZ	OpenSea	intron	0.91	0.43
cg25060388	chr1	2096722	PRKCZ	OpenSea	intron	0.97	0.88
cg09144608	chr1	2098929	PRKCZ	OpenSea	intron	0.86	0.71
cg07093776	chr1	2099468	PRKCZ	OpenSea	intron	0.95	0.8
cg07131604	chr1	2099495	PRKCZ	OpenSea	intron	0.9	0.74
cg15575834	chr1	2099845	PRKCZ	OpenSea	intron	0.92	0.78
cg09225489	chr1	2099891	PRKCZ	OpenSea	intron	0.74	0.42
cg10313879	chr1	2100435	PRKCZ	OpenSea	intron	0.92	0.87
cg18025961	chr1	2102170	PRKCZ	OpenSea	intron	0.93	0.88
cg02854763	chr1	2103155	PRKCZ	OpenSea	intron	0.95	0.87
cg07029226	chr1	2104223	PRKCZ	OpenSea	intron	0.87	0.53
cg05706173	chr1	2104310	PRKCZ	OpenSea	intron	0.94	0.62
cg21282837	chr1	2104641	PRKCZ	OpenSea	intron	0.86	0.73
cg19412821	chr1	2104786	PRKCZ	OpenSea	intron	0.97	0.79
cg06646728	chr1	2104886	PRKCZ	OpenSea	intron	0.86	0.74
cg01514357	chr1	2105392	PRKCZ	OpenSea	exon	0.92	0.74
cg27264462	chr1	2106365	PRKCZ	OpenSea	intron	0.31	0.56
cg13798228	chr1	2106732	PRKCZ	OpenSea	exon	0.94	0.69
cg00660626	chr1	2107451	PRKCZ	OpenSea	intron	0.92	0.57
cg07896009	chr1	2107669	PRKCZ	OpenSea	intron	0.82	0.5
cg10769649	chr1	2111330	PRKCZ	OpenSea	intron	0.91	0.67
cg01073918	chr1	2115256	PRKCZ	Shore	intron	0.93	0.81
cg25768250	chr1	2117733	C1orf86	Shore	intron	0.94	0.71
cg09506319	chr1	2122601	C1orf86	LOC100128003	Shore	intron	0.56	0.74
cg27312944	chr1	2125976	C1orf86	LOC100128003	Shore	intron	0.041	0.23
cg06308188	chr1	2126306	C1orf86	LOC100128003	Island	intron	0.012	0.068
cg19915466	chr1	2126372	C1orf86	LOC100128003	Island	intron	0.069	0.045
cg23441090	chr1	2126425	C1orf86	LOC100128003	Island	intron	0.022	0.096
cg18771653	chr1	2126479	C1orf86	LOC100128003	Island	intron	0.082	0.2
cg05937445	chr1	2135589	C1orf86	Shore	intron	0.45	0.67
cg27528222	chr1	2138953	C1orf86	Shore	intron	0.55	0.67
cg26031954	chr1	2139327	C1orf86	Shore	intron	0.89	0.66
cg16117513	chr1	2139657	C1orf86	Shelf	intron	0.7	0.76
cg13400516	chr1	2159040	SKI	Island	intergenic	0.033	0.16
cg27536187	chr1	2159365	SKI	Island	upstream	0.032	0.11
cg17422926	chr1	2159369	SKI	Island	upstream	0.02	0.064
cg06382459	chr1	2159373	SKI	Island	upstream	0.03	0.11
cg01787285	chr1	2162682	SKI	Shore	intron	0.049	0.26
cg16417118	chr1	2162931	SKI	Shore	intron	0.23	0.17
cg02058628	chr1	2164542	SKI	Shelf	intron	0.11	0.28
cg19404444	chr1	2164602	SKI	Shelf	intron	0.081	0.31
cg21775570	chr1	2171834	SKI	OpenSea	intron	0.099	0.2
cg19770723	chr1	2174895	SKI	OpenSea	intron	0.54	0.69
cg02360367	chr1	2180027	SKI	OpenSea	intron	0.58	0.71
cg21414505	chr1	2180697	SKI	OpenSea	intron	0.38	0.58
cg21442419	chr1	2182373	SKI	OpenSea	intron	0.83	0.52
cg03042633	chr1	2183365	SKI	OpenSea	intron	0.46	0.56
cg07114422	chr1	2183438	SKI	OpenSea	intron	0.52	0.74
cg23645210	chr1	2188767	SKI	OpenSea	intron	0.24	0.49
cg05937603	chr1	2188894	SKI	OpenSea	intron	0.31	0.5
cg08730743	chr1	2189027	SKI	OpenSea	intron	0.29	0.66
cg26880297	chr1	2191299	SKI	OpenSea	intron	0.48	0.63
cg25314600	chr1	2191354	SKI	OpenSea	intron	0.29	0.54
cg18934822	chr1	2191402	SKI	OpenSea	intron	0.56	0.71
cg12222277	chr1	2191658	SKI	OpenSea	intron	0.81	0.84
cg12483545	chr1	2198879	SKI	OpenSea	intron	0.35	0.52
cg06521970	chr1	2200890	SKI	OpenSea	intron	0.75	0.88
cg26566407	chr1	2202931	SKI	OpenSea	intron	0.53	0.72
cg06087623	chr1	2203012	SKI	OpenSea	intron	0.59	0.68
cg01949002	chr1	2203589	SKI	OpenSea	intron	0.44	0.62
cg04293353	chr1	2205396	SKI	OpenSea	intron	0.8	0.89
cg05788548	chr1	2209341	SKI	Shelf	intron	0.97	0.87
cg15007228	chr1	2210335	SKI	Shore	intron	0.41	0.56
cg06815887	chr1	2218432	SKI	Shelf	intron	0.91	0.67
cg25772076	chr1	2218495	SKI	Shelf	intron	0.41	0.61
cg03466562	chr1	2220317	SKI	Shore	intron	0.54	0.6
cg16902087	chr1	2220497	SKI	Shore	intron	0.53	0.78
cg01628067	chr1	2222419	SKI	Island	intron	0.026	0.16
cg22940848	chr1	2222486	SKI	Island	intron	0.025	0.086
cg00330518	chr1	2228160	SKI	OpenSea	intron	0.74	0.8
cg01938025	chr1	2228319	SKI	Shelf	intron	0.71	0.88
cg26264656	chr1	2229113	SKI	Shelf	intron	0.84	0.9
cg09556700	chr1	2230668	SKI	Shore	intron	0.22	0.32
cg23022809	chr1	2230923	SKI	Shore	intron	0.26	0.48
cg00618291	chr1	2234291	SKI	Shore	intron	0.68	0.8
cg16175479	chr1	2235375	SKI	Island	exon	0.8	0.6
cg20168901	chr1	2236443	SKI	Island	intron	0.65	0.8
cg03631837	chr1	2237200	SKI	Island	intron	0.65	0.86
cg20144521	chr1	2237543	SKI	Island	exon	0.93	0.68
cg11519710	chr1	2239646	SKI	Shore	exon	0.94	0.81
cg03386617	chr1	2241654		Shelf	downstream	0.77	0.84
cg11809162	chr1	2241792		Shelf	downstream	0.48	0.64
cg06952577	chr1	2244585		Shore	intergenic	0.37	0.59
cg06368978	chr1	2249896		Shore	intergenic	0.91	0.77
cg24709511	chr1	2251570		Shore	intergenic	0.88	0.72
cg00093522	chr1	2252019		Shore	downstream	0.84	0.49
cg27054514	chr1	2252995	MORN1	Shore	exon	0.63	0.7
cg12131894	chr1	2257894	MORN1	Shore	intron	0.58	0.34
cg08868601	chr1	2258153	MORN1	Island	intron	0.65	0.79
cg00988396	chr1	2259162	MORN1	Island	intron	0.86	0.78
cg21391942	chr1	2259316	MORN1	Island	intron	0.74	0.42
cg22718169	chr1	2264352	MORN1	Shore	intron	0.89	0.6
cg17849542	chr1	2266228	MORN1	Island	intron	0.88	0.68
cg16600733	chr1	2266362	MORN1	Island	intron	0.89	0.75
cg11070388	chr1	2269974	MORN1	Shelf	intron	0.66	0.72
cg04580226	chr1	2269986	MORN1	Shelf	intron	0.94	0.83
cg08662116	chr1	2271104	MORN1	OpenSea	intron	0.89	0.64
cg22519947	chr1	2271419	MORN1	OpenSea	intron	0.94	0.76
cg14982930	chr1	2275972	MORN1	Shore	intron	0.87	0.53
cg09971184	chr1	2276456	MORN1	Island	intron	0.95	0.87
cg15527356	chr1	2276565	MORN1	Island	intron	0.97	0.92
cg12409821	chr1	2276969	MORN1	Shore	intron	0.89	0.83
cg21145284	chr1	2279451	MORN1	Shelf	intron	0.83	0.64
cg07825369	chr1	2281216	MORN1	OpenSea	intron	0.7	0.63
cg07559319	chr1	2282854	LOC100129534	MORN1	OpenSea	ncRNA	0.82	0.63
cg13805052	chr1	2283063	LOC100129534	MORN1	OpenSea	ncRNA	0.86	0.7
cg08867908	chr1	2284179	MORN1	LOC100129534	OpenSea	intron	0.94	0.65
cg14288483	chr1	2286464	MORN1	OpenSea	intron	0.7	0.5
cg14222474	chr1	2286612	MORN1	OpenSea	intron	0.92	0.69
cg00089512	chr1	2288167	MORN1	OpenSea	intron	0.87	0.92
cg00104098	chr1	2302183	MORN1	Shore	intron	0.73	0.55
cg00667048	chr1	2314670	MORN1	Shore	intron	0.41	0.57
cg27545787	chr1	2316653	MORN1	Island	intron	0.46	0.57
cg03399754	chr1	2318795	MORN1	Shelf	intron	0.82	0.89
cg18860787	chr1	2322978	MORN1	RER1	Island	exon	0.016	0.14
cg24083364	chr1	2325254	RER1	Shore	intron	0.94	0.74
cg03343403	chr1	2327647	RER1	Shelf	intron	0.82	0.54
cg18435782	chr1	2328848	RER1	OpenSea	intron	0.94	0.76
cg00407413	chr1	2332075	RER1	Shore	intron	0.49	0.63
cg16590777	chr1	2334811	RER1	Shore	exon	0.95	0.84
cg03960390	chr1	2334914	RER1	Shore	exon	0.9	0.73
cg26826109	chr1	2335348	RER1	Shore	exon	0.97	0.87
cg23028631	chr1	2335500	RER1	Shore	exon	0.94	0.81
cg22526705	chr1	2335890	RER1	Shore	exon	0.95	0.73
cg07220650	chr1	2336575	PEX10	RER1	Shelf	exon	0.57	0.73
cg03764767	chr1	2338210	PEX10	Shore	exon	0.72	0.85
cg26112622	chr1	2339890	PEX10	Island	exon	0.82	0.91
cg23668539	chr1	2343726	PEX10	Island	intron	0.025	0.15
cg00584868	chr1	2344089	PEX10	Island	upstream	0.039	0.14
cg23812581	chr1	2344178	PEX10	Island	upstream	0.034	0.14
cg19098932	chr1	2345152	PEX10	Shore	intergenic	0.73	0.4
cg14373988	chr1	2345333	PEX10	Shore	intergenic	0.93	0.6
cg23629166	chr1	2345368	PEX10	Shore	intergenic	0.82	0.53
cg24439334	chr1	2345374	PEX10	Shore	intergenic	0.8	0.43
cg05814027	chr1	2345894		Island	intergenic	0.012	0.05
cg13420413	chr1	2347015		Shore	intergenic	0.76	0.83
cg12656307	chr1	2349734		Shelf	intergenic	0.39	0.57
cg12715395	chr1	2359968		Island	intergenic	0.82	0.67
cg06749803	chr1	2360074		Island	intergenic	0.74	0.39
cg01947769	chr1	2362403		Shelf	intergenic	0.62	0.55
cg25880537	chr1	2365337		OpenSea	intergenic	0.64	0.54
cg22388472	chr1	2365763		OpenSea	intergenic	0.67	0.48
cg22678044	chr1	2368610		Shelf	intergenic	0.74	0.48
cg16904348	chr1	2377415		Shore	intergenic	0.39	0.71
cg15496335	chr1	2377971		Shelf	intergenic	0.17	0.41
cg10707263	chr1	2379750		Shelf	intergenic	0.7	0.35
cg00113712	chr1	2386451		Shore	intergenic	0.86	0.65
cg24479820	chr1	2388073		Island	intergenic	0.78	0.57
cg13556452	chr1	2391241		Shelf	intergenic	0.34	0.53
cg07700843	chr1	2391317		Shelf	intergenic	0.3	0.46
cg02850689	chr1	2391347		Shelf	intergenic	0.2	0.48
cg04341153	chr1	2398858		Island	upstream	0.023	0.11
cg19694770	chr1	2407304	PLCH2	Shelf	intron	0.88	0.64
cg21285056	chr1	2407718	PLCH2	Shelf	intron	0.79	0.57
cg20351495	chr1	2408494	PLCH2	Shore	exon	0.76	0.74
cg23911852	chr1	2409853	PLCH2	Island	intron	0.63	0.51
cg04341461	chr1	2410006	PLCH2	Island	exon	0.94	0.78
cg01022121	chr1	2410885	PLCH2	Shore	intron	0.87	0.53
cg20739281	chr1	2411240	PLCH2	Island	exon	0.81	0.87
cg00055434	chr1	2415344	PLCH2	Island	intron	0.85	0.61
cg26406394	chr1	2415965	PLCH2	Shore	exon	0.91	0.83
cg26267852	chr1	2418450	PLCH2	Shelf	intron	0.75	0.62
cg08039751	chr1	2424656	PLCH2	OpenSea	intron	0.52	0.7
cg17820022	chr1	2425860	PLCH2	OpenSea	intron	0.91	0.81
cg10219816	chr1	2427655	PLCH2	OpenSea	intron	0.81	0.65
cg11854493	chr1	2429996	PLCH2	Shelf	exon	0.55	0.74
cg16031338	chr1	2430136	PLCH2	Shelf	intron	0.75	0.53
cg06322310	chr1	2436214	PLCH2	Shore	exon	0.36	0.59
cg25037677	chr1	2437047		Shore	downstream	0.47	0.63
cg10146326	chr1	2439901		Island	downstream	0.81	0.53
cg13455110	chr1	2440021	PANK4	Island	exon	0.93	0.72
cg06545477	chr1	2440127	PANK4	Island	exon	0.96	0.61
cg07010340	chr1	2442012	PANK4	Shore	intron	0.98	0.92
cg02083536	chr1	2445356	PANK4	Island	intron	0.73	0.83
cg11393031	chr1	2445527	PANK4	Island	exon	0.88	0.94
cg08471814	chr1	2446073	PANK4	Shore	intron	0.96	0.66
cg27442054	chr1	2449541	PANK4	Shore	intron	0.93	0.78
cg07762402	chr1	2450408	PANK4	Shore	intron	0.8	0.79
cg24955743	chr1	2454705	PANK4	Shore	intron	0.78	0.48
cg07832834	chr1	2457954	PANK4	Island	exon	0.027	0.13
cg27173245	chr1	2457999	PANK4	Island	exon	0.022	0.21
cg20103201	chr1	2458021	PANK4	Island	exon	0.02	0.094
cg08153752	chr1	2458258	PANK4	Island	upstream	0.091	0.079
cg22530293	chr1	2458418	PANK4	Shore	upstream	0.091	0.081
cg15678662	chr1	2465544		Shore	intergenic	0.71	0.7
cg06415891	chr1	2467096		Island	intergenic	0.34	0.57
cg12443001	chr1	2467281		Shore	intergenic	0.65	0.47
cg01806151	chr1	2470965		Shore	intergenic	0.89	0.73
cg25842470	chr1	2472373		Island	intergenic	0.13	0.4
cg04835685	chr1	2474539		Shore	intergenic	0.58	0.77
cg01692088	chr1	2476749		Shore	intergenic	0.42	0.42
cg26785823	chr1	2482001	LOC115110	Shelf	ncRNA	0.75	0.87
cg10204861	chr1	2482908	LOC115110	OpenSea	ncRNA	0.77	0.88
cg06239131	chr1	2483786	LOC115110	OpenSea	ncRNA	0.66	0.87
cg10220117	chr1	2501853		OpenSea	ncRNA	0.6	0.76
cg15726055	chr1	2506027		OpenSea	ncRNA	0.73	0.69
cg02393107	chr1	2515692		Shore	ncRNA	0.61	0.66
cg00205605	chr1	2516401		Shore	downstream	0.75	0.84
cg01051642	chr1	2517410	C1orf93	Island	upstream	0.062	0.18
cg16599266	chr1	2518110	C1orf93	Island	upstream	0.022	0.14
cg15676078	chr1	2518115	C1orf93	Island	upstream	0.027	0.12
cg11747516	chr1	2518503	C1orf93	Island	intron	0.023	0.078
cg25190491	chr1	2518505	C1orf93	Island	intron	0.038	0.1
cg24002071	chr1	2519920	C1orf93	Shore	intron	0.96	0.75
cg24117915	chr1	2523091	MMEL1	OpenSea	intron	0.93	0.74
cg06446824	chr1	2535440	MMEL1	Shelf	intron	0.52	0.33
cg11707310	chr1	2537719	MMEL1	Island	exon	0.97	0.85
cg17239770	chr1	2540942	MMEL1	Shelf	intron	0.59	0.67
cg20673091	chr1	2541236	MMEL1	Shelf	exon	0.85	0.66
cg01444797	chr1	2556817	MMEL1	Shelf	intron	0.76	0.74
cg16022081	chr1	2564329	MMEL1	Shelf	exon	0.8	0.74
cg11382394	chr1	2564504	MMEL1	Shelf	upstream	0.8	0.51
cg10626107	chr1	2564880	MMEL1	Shelf	upstream	0.73	0.56
cg04276316	chr1	2572242		Shore	downstream	0.87	0.66
cg01560642	chr1	2574068		Island	intron	0.078	0.16
cg10117795	chr1	2574549		Island	intron	0.084	0.14
cg01030973	chr1	2574695		Island	intron	0.019	0.096
cg12646754	chr1	2574751		Island	intron	0.052	0.12
cg04830049	chr1	2574885		Shore	intron	0.081	0.21
cg26523729	chr1	2576960		Shelf	exon	0.77	0.43
cg03140480	chr1	2703494		Shelf	intron	0.16	0.13
cg02328713	chr1	2704354		Shore	intron	0.77	0.69
cg04866029	chr1	2707161		Shore	upstream	0.91	0.71
cg12593176	chr1	2707573		Shore	intergenic	0.88	0.73
cg21420674	chr1	2713926		Shelf	intergenic	0.47	0.43
cg24045590	chr1	2716877		Island	intergenic	0.94	0.82
cg02894849	chr1	2720016		Shelf	intergenic	0.89	0.68
cg05697835	chr1	2722811		OpenSea	intergenic	0.77	0.41
cg08624093	chr1	2733491		OpenSea	intergenic	0.87	0.52
cg07559336	chr1	2736680		OpenSea	intergenic	0.92	0.55
cg13428681	chr1	2756210		OpenSea	intergenic	0.87	0.73
cg03976856	chr1	2764669		OpenSea	intergenic	0.49	0.38
cg19817291	chr1	2766546		OpenSea	intergenic	0.94	0.87
cg11377464	chr1	2766719		OpenSea	intergenic	0.89	0.63
cg12284465	chr1	2766872		OpenSea	intergenic	0.88	0.71
cg22615275	chr1	2767081		OpenSea	intergenic	0.9	0.61
cg24484895	chr1	2771846		Shore	intergenic	0.91	0.82
cg13923696	chr1	2772212		Island	intergenic	0.9	0.71
cg03742273	chr1	2772664		Island	intergenic	0.48	0.72
cg09173636	chr1	2775387		Shore	intergenic	0.9	0.83
cg03281194	chr1	2776972		Shore	intergenic	0.78	0.62
cg22486046	chr1	2777505		Shore	intergenic	0.92	0.79
cg17758137	chr1	2779563		Shelf	intergenic	0.9	0.75
cg07906828	chr1	2782967		OpenSea	intergenic	0.88	0.71
cg22798223	chr1	2783100		OpenSea	intergenic	0.84	0.61
cg06738239	chr1	2789089		OpenSea	intergenic	0.83	0.71
cg21570843	chr1	2789896		OpenSea	intergenic	0.85	0.63
cg07559303	chr1	2796266		OpenSea	intergenic	0.72	0.63
cg14839809	chr1	2796325		OpenSea	intergenic	0.87	0.72
cg22616417	chr1	2800194		OpenSea	intergenic	0.86	0.72
cg21691065	chr1	2804835		OpenSea	intergenic	0.7	0.41
cg20848441	chr1	2805150		OpenSea	intergenic	0.64	0.37
cg20939830	chr1	2814879		OpenSea	intergenic	0.75	0.69
cg13874287	chr1	2820170		OpenSea	intergenic	0.96	0.86
cg20849957	chr1	2820995		OpenSea	intergenic	0.84	0.79
cg04551318	chr1	2823297		OpenSea	intergenic	0.79	0.66
cg05000860	chr1	2823402		OpenSea	intergenic	0.87	0.79
cg17136696	chr1	2823861		Shelf	intergenic	0.87	0.65
cg09516210	chr1	2825189		Shelf	intergenic	0.52	0.35
cg14095607	chr1	2827034		Shore	intergenic	0.87	0.78
cg15356461	chr1	2827833		Island	intergenic	0.93	0.83
cg15515265	chr1	2828198		Island	intergenic	0.83	0.72
cg06347582	chr1	2829700		Shore	intergenic	0.75	0.51
cg16298867	chr1	2833643		OpenSea	intergenic	0.81	0.62
cg06316219	chr1	2834040		OpenSea	intergenic	0.91	0.6
cg14836978	chr1	2836564		OpenSea	intergenic	0.83	0.9
cg19268708	chr1	2837518		OpenSea	intergenic	0.73	0.35
cg00905419	chr1	2839179		OpenSea	intergenic	0.91	0.8
cg06988547	chr1	2839763		OpenSea	intergenic	0.74	0.34
cg02634762	chr1	2839859		OpenSea	intergenic	0.9	0.51
cg19802390	chr1	2840177		OpenSea	intergenic	0.85	0.55
cg20608032	chr1	2840240		OpenSea	intergenic	0.87	0.68
cg24741158	chr1	2844168		Shelf	intergenic	0.77	0.65
cg24428184	chr1	2848110		Shore	intergenic	0.87	0.72
cg13547712	chr1	2850512		Shore	intergenic	0.95	0.77
cg13402298	chr1	2850682		Island	intergenic	0.92	0.75
cg21409829	chr1	2850859		Island	intergenic	0.88	0.77
cg00646546	chr1	2853362		Shelf	intergenic	0.91	0.76
cg06184325	chr1	2863098		OpenSea	intergenic	0.77	0.55
cg09135754	chr1	2863146		OpenSea	intergenic	0.73	0.48
cg03986665	chr1	2864015		OpenSea	intergenic	0.47	0.27
cg10115148	chr1	2872908		Shelf	intergenic	0.62	0.33
cg23932261	chr1	2876546		Island	intergenic	0.6	0.49
cg15831346	chr1	2876723		Island	intergenic	0.7	0.63
cg16298813	chr1	2878455		Shore	intergenic	0.9	0.74
cg17474920	chr1	2882827		Shelf	intergenic	0.83	0.59
cg01977798	chr1	2886792		Island	intergenic	0.73	0.54
cg20848343	chr1	2887080		Shore	intergenic	0.79	0.56
cg13300670	chr1	2896834		OpenSea	intergenic	0.77	0.65
cg03737787	chr1	2899656		OpenSea	intergenic	0.34	0.61
cg00500221	chr1	2915875		Shelf	intergenic	0.92	0.54
cg00830435	chr1	2918526		Island	intergenic	0.88	0.8
cg22517653	chr1	2918612		Island	intergenic	0.9	0.68
cg07099084	chr1	2919785		Shore	intergenic	0.94	0.55
cg16120196	chr1	2922569		Shelf	intergenic	0.55	0.44
cg16562486	chr1	2925740		Shelf	intergenic	0.85	0.52
cg03296283	chr1	2928403		Shore	intergenic	0.33	0.54
cg23226249	chr1	2928506		Shore	intergenic	0.32	0.54
cg20141398	chr1	2928616		Shore	intergenic	0.43	0.62
cg22377505	chr1	2929156		Island	intergenic	0.087	0.16
cg14653390	chr1	2930315		Shore	intergenic	0.92	0.83
cg17025560	chr1	2936277		Shelf	intergenic	0.92	0.77
cg15211996	chr1	2936768	ACTRT2	Shore	intergenic	0.69	0.56
cg13871495	chr1	2937246	ACTRT2	Shore	upstream	0.94	0.73
cg04716261	chr1	2937999	ACTRT2	Shore	upstream	0.32	0.23
cg18123385	chr1	2938122	ACTRT2	Shore	exon	0.63	0.46
cg24669191	chr1	2938646	ACTRT2	Island	exon	0.96	0.85
cg07795402	chr1	2938954	ACTRT2	Island	exon	0.8	0.59
cg05162202	chr1	2939117	ACTRT2	Shore	exon	0.89	0.73
cg13947317	chr1	2939463	ACTRT2	Shore	exon	0.96	0.85
cg22526216	chr1	2940333		Shore	downstream	0.89	0.72
cg27531496	chr1	2943891		OpenSea	intergenic	0.83	0.66
cg06201717	chr1	2949633		OpenSea	intergenic	0.86	0.49
cg24150662	chr1	2949673		OpenSea	intergenic	0.94	0.8
cg00113369	chr1	2977861	FLJ42875	Shore	ncRNA	0.68	0.6
cg17173498	chr1	2985494	FLJ42875	PRDM16	Island	upstream	0.022	0.12
cg26938364	chr1	2985527	FLJ42875	PRDM16	Island	upstream	0.04	0.17
cg07348009	chr1	2985689	PRDM16	FLJ42875	Island	upstream	0.14	0.29
cg08537652	chr1	2986362	PRDM16	Island	intron	0.039	0.14
cg15390554	chr1	2986366	PRDM16	Island	intron	0.02	0.087
cg13744917	chr1	2986538	PRDM16	Island	intron	0.019	0.092
cg12267948	chr1	2986566	PRDM16	Island	intron	0.015	0.11
cg17239558	chr1	2987332	PRDM16	Island	intron	0.069	0.16
cg18509466	chr1	2987961	PRDM16	Island	intron	0.42	0.5
cg25618424	chr1	2989307	PRDM16	Shore	intron	0.59	0.7
cg07922619	chr1	2997742	PRDM16	Shore	intron	0.94	0.83
cg09663655	chr1	2999728	PRDM16	Island	intron	0.91	0.63
cg03525023	chr1	3003609	PRDM16	Shelf	intron	0.91	0.65
cg13460934	chr1	3003690	PRDM16	Shelf	intron	0.75	0.58
cg14852736	chr1	3006329	PRDM16	OpenSea	intron	0.88	0.71
cg24678113	chr1	3006466	PRDM16	OpenSea	intron	0.69	0.56
cg27564383	chr1	3007701	PRDM16	OpenSea	intron	0.93	0.78
cg08882612	chr1	3007768	PRDM16	OpenSea	intron	0.96	0.84
cg00387551	chr1	3011304	PRDM16	OpenSea	intron	0.69	0.81
cg10520026	chr1	3016293	PRDM16	OpenSea	intron	0.85	0.57
cg15818632	chr1	3017794	PRDM16	OpenSea	intron	0.33	0.56
cg12701603	chr1	3023977	PRDM16	OpenSea	intron	0.75	0.6
cg21604357	chr1	3027471	PRDM16	Shore	intron	0.78	0.65
cg08876274	chr1	3028230	PRDM16	Island	intron	0.79	0.68
cg14761019	chr1	3028485	PRDM16	Island	intron	0.74	0.62
cg06773295	chr1	3028577	PRDM16	Shore	intron	0.97	0.87
cg12905252	chr1	3028813	PRDM16	Shore	intron	0.76	0.39
cg01046951	chr1	3028877	PRDM16	Shore	intron	0.89	0.67
cg27444751	chr1	3029051	PRDM16	Shore	intron	0.87	0.66
cg20632748	chr1	3031460	PRDM16	Shelf	intron	0.93	0.83
cg06976533	chr1	3032965	PRDM16	OpenSea	intron	0.91	0.76
cg07168837	chr1	3037275	PRDM16	Shore	intron	0.83	0.66
cg26653867	chr1	3037655	PRDM16	Shore	intron	0.93	0.74
cg13907655	chr1	3037712	PRDM16	Shore	intron	0.91	0.59
cg09271661	chr1	3039059	PRDM16	Shore	intron	0.88	0.73
cg22712408	chr1	3039662	PRDM16	Shore	intron	0.79	0.51
cg21383687	chr1	3045052	PRDM16	OpenSea	intron	0.89	0.74
cg22949832	chr1	3047342	PRDM16	OpenSea	intron	0.92	0.74
cg15121959	chr1	3052866	PRDM16	Shelf	intron	0.93	0.8
cg13104257	chr1	3055699	PRDM16	Shore	intron	0.76	0.47
cg05117823	chr1	3056152	PRDM16	Shore	intron	0.37	0.64
cg05035508	chr1	3056640	PRDM16	Island	intron	0.38	0.66
cg06617975	chr1	3056742	PRDM16	Island	intron	0.49	0.63
cg26545580	chr1	3056755	PRDM16	Island	intron	0.42	0.64
cg21299491	chr1	3057366	PRDM16	Shore	intron	0.97	0.84
cg00049709	chr1	3057810	PRDM16	Shore	intron	0.9	0.77
cg19866637	chr1	3057893	PRDM16	Shore	intron	0.94	0.73
cg05343184	chr1	3058151	PRDM16	Shore	intron	0.85	0.58
cg24300981	chr1	3059626	PRDM16	Shore	intron	0.94	0.85
cg25745135	chr1	3059820	PRDM16	Shore	intron	0.95	0.85
cg16926445	chr1	3064439	PRDM16	OpenSea	intron	0.89	0.73
cg06814194	chr1	3070337	PRDM16	Shore	intron	0.86	0.58
cg02481237	chr1	3070603	PRDM16	Shore	intron	0.78	0.6
cg21401095	chr1	3078839	PRDM16	Shelf	intron	0.68	0.41
cg07622451	chr1	3079886	PRDM16	Shore	intron	0.93	0.72
cg01413848	chr1	3081226	PRDM16	Island	intron	0.97	0.83
cg04316231	chr1	3083535	PRDM16	Shelf	intron	0.82	0.89
cg05755889	chr1	3089076	PRDM16	OpenSea	intron	0.91	0.75
cg20699701	chr1	3089762	PRDM16	OpenSea	intron	0.21	0.26
cg12133962	chr1	3090134	PRDM16	OpenSea	intron	0.72	0.47
cg24682449	chr1	3094566	PRDM16	OpenSea	intron	0.86	0.69
cg06748955	chr1	3094696	PRDM16	OpenSea	intron	0.93	0.73
cg25411239	chr1	3094859	PRDM16	OpenSea	intron	0.92	0.78
cg15090440	chr1	3099233	PRDM16	Shelf	intron	0.87	0.59
cg13393782	chr1	3099804	PRDM16	Shelf	intron	0.78	0.57
cg22860172	chr1	3099917	PRDM16	Shelf	intron	0.9	0.69
cg21338857	chr1	3101776	PRDM16	Shore	intron	0.93	0.83
cg02767788	chr1	3102750	PRDM16	Island	exon	0.91	0.58
cg00254258	chr1	3105189	PRDM16	Island	intron	0.82	0.56
cg20629417	chr1	3106929	PRDM16	Shore	intron	0.87	0.64
cg15391425	chr1	3106994	PRDM16	Shore	intron	0.87	0.66
cg02892384	chr1	3108803	PRDM16	Shelf	intron	0.92	0.83
cg11222503	chr1	3110815	PRDM16	Shore	intron	0.93	0.72
cg21836418	chr1	3111280	PRDM16	Shore	intron	0.98	0.84
cg23950223	chr1	3113088	PRDM16	Shore	intron	0.83	0.56
cg16260013	chr1	3114820	PRDM16	Shelf	intron	0.9	0.48
cg07345710	chr1	3120013	PRDM16	OpenSea	intron	0.96	0.75
cg00774867	chr1	3120245	PRDM16	OpenSea	intron	0.78	0.27
cg05804170	chr1	3121514	PRDM16	OpenSea	intron	0.8	0.68
cg12408250	chr1	3121727	PRDM16	OpenSea	intron	0.78	0.64
cg24873695	chr1	3123054	PRDM16	OpenSea	intron	0.96	0.81
cg00581154	chr1	3123695	PRDM16	OpenSea	intron	0.8	0.59
cg21692930	chr1	3124533	PRDM16	OpenSea	intron	0.94	0.82
cg25349768	chr1	3126154	PRDM16	OpenSea	intron	0.96	0.76
cg09119863	chr1	3129238	PRDM16	OpenSea	intron	0.7	0.54
cg05265611	chr1	3129633	PRDM16	OpenSea	intron	0.83	0.53
cg25372239	chr1	3130550	PRDM16	OpenSea	intron	0.8	0.6
cg23025459	chr1	3134420	PRDM16	OpenSea	intron	0.58	0.44
cg04500730	chr1	3135083	PRDM16	OpenSea	intron	0.76	0.58
cg04499214	chr1	3140299	PRDM16	OpenSea	intron	0.92	0.67
cg23265656	chr1	3140355	PRDM16	OpenSea	intron	0.96	0.85
cg05712300	chr1	3140709	PRDM16	OpenSea	intron	0.92	0.79
cg19158549	chr1	3140906	PRDM16	OpenSea	intron	0.9	0.84
cg11710123	chr1	3141992	PRDM16	OpenSea	intron	0.88	0.73
cg22497969	chr1	3143018	PRDM16	OpenSea	intron	0.85	0.64
cg26864297	chr1	3143965	PRDM16	Shelf	intron	0.68	0.51
cg05790380	chr1	3144209	PRDM16	Shelf	intron	0.73	0.59
cg06099439	chr1	3146905	PRDM16	Shore	intron	0.76	0.68
cg01777678	chr1	3147329	PRDM16	Shore	intron	0.9	0.86
cg00030466	chr1	3147891	PRDM16	Island	intron	0.98	0.85
cg24641193	chr1	3147941	PRDM16	Island	intron	0.95	0.86
cg00895834	chr1	3147966	PRDM16	Island	intron	0.94	0.62
cg05628625	chr1	3148810	PRDM16	Shore	intron	0.85	0.74
cg07974025	chr1	3150935	PRDM16	Shelf	intron	0.86	0.59
cg03885431	chr1	3153144	PRDM16	Shelf	intron	0.86	0.69
cg03082523	chr1	3155965	PRDM16	Shore	intron	0.71	0.68
cg06379192	chr1	3157287	PRDM16	Shore	intron	0.94	0.81
cg11392550	chr1	3157321	PRDM16	Shore	intron	0.92	0.7
cg24645149	chr1	3159083	PRDM16	Shore	intron	0.9	0.71
cg13867039	chr1	3159645	PRDM16	Shore	intron	0.84	0.67
cg23085167	chr1	3160739	PRDM16	Shelf	intron	0.78	0.66
cg05791946	chr1	3160851	PRDM16	Shelf	intron	0.84	0.8
cg04876124	chr1	3160911	PRDM16	Shelf	intron	0.94	0.83
cg22730864	chr1	3161448	PRDM16	Shelf	intron	0.9	0.75
cg00849570	chr1	3162104	PRDM16	Shore	intron	0.63	0.37
cg12800122	chr1	3162454	PRDM16	Shore	intron	0.94	0.63
cg27229529	chr1	3162676	PRDM16	Shore	intron	0.83	0.56
cg10201191	chr1	3163472	PRDM16	Shore	intron	0.88	0.76
cg15115055	chr1	3163545	PRDM16	Shore	intron	0.96	0.83
cg16694785	chr1	3163710	PRDM16	Shore	intron	0.85	0.55
cg24629455	chr1	3163970	PRDM16	Island	intron	0.96	0.64
cg22440573	chr1	3163985	PRDM16	Island	intron	0.8	0.49
cg09990962	chr1	3164431	PRDM16	Island	intron	0.67	0.39
cg10100424	chr1	3178384	PRDM16	OpenSea	intron	0.65	0.53
cg11325950	chr1	3182736	PRDM16	Shore	intron	0.91	0.81
cg18966232	chr1	3183165	PRDM16	Island	intron	0.95	0.82
cg00103908	chr1	3184106	PRDM16	Shore	intron	0.97	0.79
cg17220278	chr1	3184704	PRDM16	Island	intron	0.94	0.7
cg09891226	chr1	3185042	PRDM16	Shore	intron	0.94	0.59
cg26513591	chr1	3187091	PRDM16	Shelf	intron	0.86	0.71
cg13434489	chr1	3189088	PRDM16	OpenSea	intron	0.84	0.51
cg03449456	chr1	3191219	PRDM16	OpenSea	intron	0.78	0.6
cg26520908	chr1	3191876	PRDM16	Shelf	intron	0.9	0.8
cg17940849	chr1	3193280	PRDM16	Shelf	intron	0.8	0.6
cg02067098	chr1	3195570	PRDM16	Island	intron	0.9	0.71
cg07212761	chr1	3199650	PRDM16	Shelf	intron	0.95	0.74
cg17421241	chr1	3201953	PRDM16	Shore	intron	0.75	0.55
cg03401034	chr1	3205543	PRDM16	Shore	intron	0.91	0.71
cg21682432	chr1	3207419	PRDM16	Shelf	intron	0.9	0.81
cg11250802	chr1	3207502	PRDM16	Shelf	intron	0.88	0.78
cg15823330	chr1	3207539	PRDM16	Shelf	intron	0.93	0.81
cg21160149	chr1	3208865	PRDM16	OpenSea	intron	0.88	0.72
cg16011907	chr1	3209104	PRDM16	OpenSea	intron	0.92	0.81
cg06521247	chr1	3209787	PRDM16	OpenSea	intron	0.88	0.78
cg10328768	chr1	3210325	PRDM16	OpenSea	intron	0.86	0.62
cg11157172	chr1	3210417	PRDM16	OpenSea	intron	0.87	0.65
cg24298696	chr1	3210424	PRDM16	OpenSea	intron	0.79	0.57
cg04120680	chr1	3213486	PRDM16	OpenSea	intron	0.79	0.44
cg19244263	chr1	3213668	PRDM16	OpenSea	intron	0.78	0.52
cg04907885	chr1	3213790	PRDM16	OpenSea	intron	0.9	0.81
cg01793374	chr1	3234007	PRDM16	OpenSea	intron	0.93	0.83
cg04882365	chr1	3234186	PRDM16	OpenSea	intron	0.81	0.48
cg15156029	chr1	3234644	PRDM16	OpenSea	intron	0.94	0.88
cg13875033	chr1	3236688	PRDM16	Shelf	intron	0.58	0.46
cg11709254	chr1	3258365	PRDM16	OpenSea	intron	0.95	0.88
cg21848084	chr1	3264381	PRDM16	OpenSea	intron	0.52	0.4
cg24003749	chr1	3275052	PRDM16	Island	intron	0.88	0.69
cg06911744	chr1	3276507	PRDM16	Shore	intron	0.74	0.61
cg12593511	chr1	3276753	PRDM16	Shore	intron	0.48	0.26
cg13087441	chr1	3277000	PRDM16	Shore	intron	0.89	0.8
cg16002887	chr1	3280682	PRDM16	OpenSea	intron	0.91	0.77
cg21848088	chr1	3280988	PRDM16	OpenSea	intron	0.95	0.84
cg23050300	chr1	3281321	PRDM16	OpenSea	intron	0.65	0.51
cg08831401	chr1	3283488	PRDM16	OpenSea	intron	0.47	0.44
cg01713250	chr1	3289915	PRDM16	OpenSea	intron	0.89	0.76
cg07550869	chr1	3302283	PRDM16	OpenSea	intron	0.92	0.69
cg23821340	chr1	3303053	PRDM16	OpenSea	intron	0.93	0.79
cg04882222	chr1	3303301	PRDM16	Shelf	intron	0.8	0.55
cg12034510	chr1	3303347	PRDM16	Shelf	intron	0.89	0.73
cg18024629	chr1	3303376	PRDM16	Shelf	intron	0.75	0.41
cg15641565	chr1	3303887	PRDM16	Shelf	intron	0.85	0.74
cg06824308	chr1	3303958	PRDM16	Shelf	intron	0.73	0.5
cg15385853	chr1	3304131	PRDM16	Shelf	intron	0.94	0.76
cg15386853	chr1	3306999	PRDM16	Shore	intron	0.84	0.68
cg25783497	chr1	3307070	PRDM16	Island	intron	0.78	0.61
cg10956857	chr1	3308549	PRDM16	Shore	intron	0.93	0.84
cg26846424	chr1	3310103	PRDM16	Island	intron	0.67	0.54
cg10519004	chr1	3314443	PRDM16	Shelf	intron	0.85	0.52
cg07112867	chr1	3315163	PRDM16	OpenSea	intron	0.95	0.84
cg00401797	chr1	3315193	PRDM16	OpenSea	intron	0.92	0.68
cg16120249	chr1	3315281	PRDM16	OpenSea	intron	0.86	0.8
cg17286074	chr1	3315497	PRDM16	OpenSea	intron	0.84	0.61
cg23999080	chr1	3319264	PRDM16	Shelf	intron	0.71	0.49
cg19317333	chr1	3319433	PRDM16	Shore	exon	0.91	0.78
cg23738647	chr1	3319509	PRDM16	Shore	exon	0.9	0.79
cg25362585	chr1	3320431	PRDM16	Shore	intron	0.93	0.78
cg05968369	chr1	3320446	PRDM16	Shore	intron	0.93	0.83
cg24663541	chr1	3320854	PRDM16	Shore	intron	0.93	0.61
cg00761129	chr1	3321869	PRDM16	Island	intron	0.92	0.82
cg13242468	chr1	3323806	PRDM16	Shore	intron	0.92	0.73
cg04423188	chr1	3328023	PRDM16	Island	exon	0.91	0.79
cg24395386	chr1	3328593	PRDM16	Island	exon	0.91	0.65
cg12268236	chr1	3329292	PRDM16	Island	exon	0.94	0.63
cg02831383	chr1	3329820	PRDM16	Shore	intron	0.94	0.81
cg13993877	chr1	3330724	PRDM16	Shore	intron	0.95	0.86
cg26014413	chr1	3331080	PRDM16	Island	intron	0.98	0.83
cg02072896	chr1	3331137	PRDM16	Island	exon	0.92	0.73
cg04346637	chr1	3331154	PRDM16	Island	exon	0.87	0.7
cg17412901	chr1	3332705	PRDM16	Shore	intron	0.79	0.5
cg09788762	chr1	3334101	PRDM16	Shore	intron	0.93	0.77
cg17404787	chr1	3340625	PRDM16	Shore	intron	0.87	0.69
cg20387569	chr1	3342307	PRDM16	Island	exon	0.81	0.73
cg07109490	chr1	3342578	PRDM16	Island	intron	0.9	0.79
cg15903666	chr1	3342691	PRDM16	Island	exon	0.94	0.71
cg10685531	chr1	3342726	PRDM16	Island	exon	0.95	0.83
cg13800721	chr1	3343612	PRDM16	Shore	intron	0.82	0.65
cg03352346	chr1	3344295	PRDM16	Shore	intron	0.83	0.72
cg13858944	chr1	3344880	PRDM16	Shelf	intron	0.89	0.86
cg02061757	chr1	3347146	PRDM16	OpenSea	intron	0.77	0.54
cg20798164	chr1	3347577	PRDM16	Shelf	exon	0.96	0.7
cg00804097	chr1	3349982	PRDM16	Shore	intron	0.89	0.75
cg04285727	chr1	3350440	PRDM16	Shore	exon	0.91	0.65
cg22608265	chr1	3351106	PRDM16	Shore	exon	0.65	0.37
cg06313241	chr1	3351504	PRDM16	Island	exon	0.96	0.85
cg01773689	chr1	3351615	PRDM16	Island	exon	0.85	0.65
cg02333588	chr1	3352830	PRDM16	Shore	exon	0.96	0.7
cg11848748	chr1	3352884	PRDM16	Shore	exon	0.97	0.87
cg02587392	chr1	3354412	PRDM16	Shelf	exon	0.86	0.8
cg13479148	chr1	3354433	PRDM16	Shelf	exon	0.96	0.86
cg12694058	chr1	3354467	PRDM16	Shelf	exon	0.94	0.84
cg10709432	chr1	3361130		OpenSea	intergenic	0.95	0.74
cg18936550	chr1	3368447		Shelf	intergenic	0.87	0.71
cg27526892	chr1	3372482	ARHGEF16	Shore	intron	0.91	0.78
cg01930478	chr1	3373794	ARHGEF16	Shelf	intron	0.7	0.87
cg21197219	chr1	3374906	ARHGEF16	Shelf	intron	0.26	0.16
cg08107987	chr1	3377869	ARHGEF16	OpenSea	intron	0.97	0.83
cg10629420	chr1	3377918	ARHGEF16	OpenSea	intron	0.94	0.75
cg13848291	chr1	3380111	ARHGEF16	OpenSea	exon	0.89	0.72
cg24919884	chr1	3380288	ARHGEF16	OpenSea	intron	0.82	0.7
cg19366986	chr1	3381321	ARHGEF16	OpenSea	intron	0.79	0.59
cg15900221	chr1	3382434	ARHGEF16	OpenSea	intron	0.76	0.51
cg13580226	chr1	3383460	ARHGEF16	OpenSea	intron	0.88	0.55
cg14039138	chr1	3383526	ARHGEF16	OpenSea	intron	0.84	0.7
cg24371534	chr1	3384929	ARHGEF16	OpenSea	intron	0.75	0.7
cg21869174	chr1	3385687	ARHGEF16	OpenSea	intron	0.93	0.71
cg08711320	chr1	3387932	ARHGEF16	OpenSea	intron	0.86	0.71
cg02328660	chr1	3389744	ARHGEF16	OpenSea	exon	0.96	0.74
cg05927460	chr1	3393024	ARHGEF16	Shore	intron	0.9	0.91
cg16104263	chr1	3394709	ARHGEF16	Island	intron	0.91	0.67
cg09180894	chr1	3395053	ARHGEF16	Island	exon	0.82	0.5
cg26940122	chr1	3397061	ARHGEF16	Shore	exon	0.93	0.73
cg10020040	chr1	3397621	ARHGEF16	Shelf	exon	0.63	0.38
cg02303801	chr1	3399318		OpenSea	intergenic	0.62	0.43
cg06180630	chr1	3401607		OpenSea	intergenic	0.85	0.58
cg13901857	chr1	3401697		OpenSea	intergenic	0.9	0.73
cg12611135	chr1	3401748		OpenSea	intergenic	0.89	0.72
cg06438312	chr1	3407078	MEGF6	OpenSea	exon	0.8	0.64
cg23090396	chr1	3407936	MEGF6	OpenSea	intron	0.042	0.12
cg00958381	chr1	3408036	MEGF6	OpenSea	intron	0.051	0.16
cg11391665	chr1	3417081	MEGF6	OpenSea	intron	0.81	0.36
cg12061019	chr1	3417208	MEGF6	OpenSea	exon	0.93	0.75
cg01215682	chr1	3424530	MEGF6	Shore	intron	0.82	0.67
cg06353486	chr1	3427479	MEGF6	Island	intron	0.9	0.68
cg21870645	chr1	3431414	MEGF6	Shelf	intron	0.9	0.79
cg23686029	chr1	3435989	MEGF6	Island	intron	0.82	0.88
cg20451455	chr1	3449825	MEGF6	Shore	intron	0.72	0.67
cg12302527	chr1	3461381	MEGF6	Shore	intron	0.88	0.64
cg21811896	chr1	3465381	MEGF6	OpenSea	intron	0.78	0.67
cg26821543	chr1	3466683	MEGF6	OpenSea	intron	0.87	0.72
cg05347635	chr1	3466879	MEGF6	OpenSea	intron	0.79	0.9
cg18288161	chr1	3469677	MEGF6	OpenSea	intron	0.93	0.77
cg27637706	chr1	3472204	MEGF6	OpenSea	intron	0.63	0.36
cg14421582	chr1	3481668	MEGF6	OpenSea	intron	0.58	0.43
cg22335847	chr1	3482838	MEGF6	OpenSea	intron	0.74	0.6
cg14263070	chr1	3495717	MEGF6	OpenSea	intron	0.61	0.44
cg03117540	chr1	3498927	MEGF6	Shore	intron	0.98	0.87
cg26406401	chr1	3499759	MEGF6	Shore	intron	0.92	0.8
cg12715285	chr1	3504125	MEGF6	Shelf	intron	0.94	0.71
cg26524905	chr1	3506323	MEGF6	OpenSea	intron	0.92	0.79
cg07045221	chr1	3519046	MEGF6	OpenSea	exon	0.97	0.83
cg19498239	chr1	3525092	MEGF6	Shelf	intron	0.88	0.67
cg01488300	chr1	3527126	MEGF6	Shore	intron	0.41	0.34
cg15154191	chr1	3527782	MEGF6	Island	exon	0.031	0.13
cg16033941	chr1	3527997	MEGF6	Island	exon	0.082	0.23
cg21830313	chr1	3528077	MEGF6	Island	upstream	0.03	0.12
cg11708899	chr1	3532983		OpenSea	intergenic	0.91	0.51
cg22494767	chr1	3533028		OpenSea	intergenic	0.91	0.75
cg06762750	chr1	3534422		OpenSea	intergenic	0.9	0.55
cg24307703	chr1	3538168		Shelf	intergenic	0.84	0.67
cg20522675	chr1	3540077	TPRG1L	Shore	intergenic	0.39	0.61
cg07453618	chr1	3541082	TPRG1L	Island	upstream	0.011	0.034
cg00778905	chr1	3541386	TPRG1L	Island	upstream	0.013	0.083
cg06188019	chr1	3541438	TPRG1L	Island	upstream	0.019	0.11
cg10074513	chr1	3541656	TPRG1L	Island	exon	0.035	0.13
cg23659029	chr1	3545707	TPRG1L	Shelf	exon	0.96	0.87
cg02631153	chr1	3549646	WDR8	OpenSea	intron	0.95	0.75
cg12857678	chr1	3549732	WDR8	OpenSea	intron	0.89	0.6
cg22437723	chr1	3551675	WDR8	OpenSea	intron	0.86	0.51
cg18390621	chr1	3553628	WDR8	Shelf	exon	0.97	0.91
cg26574621	chr1	3555038	WDR8	Shore	intron	0.96	0.86
cg16563938	chr1	3555442	WDR8	Shore	intron	0.94	0.74
cg06650698	chr1	3558138	WDR8	Shore	intron	0.93	0.69
cg23802150	chr1	3559889	WDR8	Shore	intron	0.93	0.73
cg04361279	chr1	3560965	WDR8	Island	intron	0.96	0.85
cg11742922	chr1	3561824	WDR8	Shore	intron	0.91	0.77
cg18764372	chr1	3561934	WDR8	Shore	intron	0.98	0.91
cg09232289	chr1	3562654	WDR8	Shore	intron	0.98	0.91
cg18794426	chr1	3563325	WDR8	Shelf	exon	0.95	0.78
cg11734988	chr1	3563415	WDR8	Shelf	intron	0.95	0.82
cg05399785	chr1	3564031	WDR8	Shelf	exon	0.88	0.67
cg01530317	chr1	3566579	WDR8	Island	exon	0.026	0.11
cg01101400	chr1	3566704	WDR8	Island	upstream	0.016	0.12
cg18279839	chr1	3566744	WDR8	Island	upstream	0.049	0.17
cg06839380	chr1	3566763	WDR8	Island	upstream	0.017	0.081
cg04344205	chr1	3566818	WDR8	Island	upstream	0.041	0.15
cg25885108	chr1	3568669	TP73	Island	upstream	0.06	0.17
cg11729413	chr1	3568692	TP73	Island	upstream	0.044	0.12
cg24336278	chr1	3568701	TP73	Island	upstream	0.042	0.099
cg16406833	chr1	3568710	TP73	Island	upstream	0.04	0.11
cg02153614	chr1	3568722	TP73	Island	upstream	0.031	0.084
cg17919477	chr1	3574507	TP73	OpenSea	intron	0.84	0.62
cg05936300	chr1	3574704	TP73	OpenSea	intron	0.67	0.37
cg20768358	chr1	3574999	TP73	OpenSea	intron	0.57	0.42
cg21827809	chr1	3575147	TP73	OpenSea	intron	0.77	0.6
cg06830875	chr1	3575586	TP73	OpenSea	intron	0.81	0.75
cg13943358	chr1	3575917	TP73	OpenSea	intron	0.91	0.85
cg21906716	chr1	3579978	TP73	OpenSea	intron	0.96	0.8
cg11226808	chr1	3581320	TP73	OpenSea	intron	0.87	0.6
cg27055894	chr1	3590920	TP73	OpenSea	intron	0.3	0.53
cg11523134	chr1	3605747	TP73	Shore	intron	0.77	0.54
cg24356964	chr1	3605979	TP73	Shore	intron	0.71	0.51
cg00589002	chr1	3606082	TP73	Shore	intron	0.64	0.4
cg23163013	chr1	3606892	TP73	Shore	intron	0.87	0.78
cg25115460	chr1	3607110	TP73	Island	intron	0.74	0.44
cg18873878	chr1	3607116	TP73	Island	intron	0.77	0.59
cg24878868	chr1	3607401	TP73	Island	exon	0.89	0.86
cg08887707	chr1	3613723	TP73	OpenSea	intron	0.97	0.64
cg15161371	chr1	3613808	TP73	OpenSea	intron	0.92	0.79
cg18279180	chr1	3614190	TP73	OpenSea	intron	0.89	0.84
cg03899737	chr1	3615390	TP73	OpenSea	intron	0.96	0.87
cg11585071	chr1	3615457	TP73	OpenSea	intron	0.94	0.7
cg23234149	chr1	3615561	TP73	OpenSea	intron	0.87	0.56
cg20628743	chr1	3615715	TP73	OpenSea	intron	0.96	0.85
cg03043665	chr1	3615762	TP73	OpenSea	intron	0.95	0.78
cg22234529	chr1	3616498	TP73	OpenSea	intron	0.41	0.26
cg17907911	chr1	3617661	TP73	OpenSea	intron	0.8	0.66
cg19519630	chr1	3617886	TP73	OpenSea	intron	0.65	0.43
cg17967071	chr1	3619574	TP73	Shelf	intron	0.83	0.51
cg00505606	chr1	3620638	TP73	Shelf	intron	0.62	0.4
cg04523603	chr1	3622085	TP73	Shore	intron	0.36	0.55
cg25758394	chr1	3623859	TP73	Shore	intron	0.91	0.75
cg14660788	chr1	3625312	TP73	Shore	intron	0.75	0.5
cg17441982	chr1	3626994	TP73	Shelf	intron	0.9	0.65
cg22039909	chr1	3635100	TP73	Island	intron	0.81	0.58
cg25352980	chr1	3635210	TP73	Shore	intron	0.78	0.54
cg03664527	chr1	3648749	TP73	Shore	intron	0.4	0.64
cg24845675	chr1	3649971	TP73	Shore	exon	0.87	0.66
cg23984080	chr1	3659702	KIAA0495	Shelf	ncRNA	0.93	0.85
cg14912788	chr1	3661862	KIAA0495	Shore	ncRNA	0.76	0.89
cg00397104	chr1	3662685	KIAA0495	Shore	ncRNA	0.52	0.68
cg01793449	chr1	3663339	KIAA0495	Island	ncRNA	0.12	0.25
cg15472784	chr1	3663531	KIAA0495	Island	ncRNA	0.07	0.19
cg25467973	chr1	3663705	KIAA0495	Island	ncRNA	0.095	0.16
cg24934561	chr1	3663902	KIAA0495	Island	ncRNA	0.097	0.18
cg16991768	chr1	3664047	KIAA0495	Island	upstream	0.069	0.15
cg03909781	chr1	3664064	KIAA0495	Island	upstream	0.056	0.14
cg03609308	chr1	3664084	KIAA0495	Island	upstream	0.051	0.15
cg02255801	chr1	3665189	KIAA0495	Shore	intergenic	0.77	0.61
cg07145709	chr1	3667876	CCDC27	Shelf	intergenic	0.73	0.53
cg08670691	chr1	3668942	CCDC27	OpenSea	upstream	0.89	0.73
cg10634712	chr1	3687804	CCDC27	Shore	intron	0.46	0.65
cg04347006	chr1	3688759	LOC388588	Island	up/downstream	0.13	0.28
cg07549162	chr1	3689170	LOC388588	Island	up/downstream	0.073	0.16
cg02454982	chr1	3689201	LOC388588	Island	up/downstream	0.061	0.25
cg10555106	chr1	3691387	LOC388588	Shore	intron	0.53	0.74
cg00105640	chr1	3691994	LOC388588	Shelf	exon	0.6	0.6
cg17499822	chr1	3696143		OpenSea	downstream	0.5	0.78
cg17603271	chr1	3696181		OpenSea	downstream	0.73	0.85
cg09251492	chr1	3701070	LRRC47	Shelf	intron	0.96	0.83
cg26550851	chr1	3701203	LRRC47	Shelf	intron	0.94	0.68
cg17443473	chr1	3703550	LRRC47	Shore	exon	0.87	0.92
cg18436788	chr1	3704244	LRRC47	Shore	intron	0.93	0.81
cg25215194	chr1	3706322	LRRC47	Shelf	intron	0.64	0.88
cg11522905	chr1	3707176	LRRC47	Shelf	intron	0.67	0.71
cg03318469	chr1	3710303	LRRC47	Shelf	intron	0.45	0.23
cg17709703	chr1	3712510	LRRC47	Island	exon	0.03	0.096
cg19828298	chr1	3713105	LRRC47	Island	upstream	0.11	0.14
cg18809873	chr1	3713352	LRRC47	Shore	upstream	0.088	0.29
cg01934638	chr1	3720744		OpenSea	intergenic	0.79	0.62
cg03761258	chr1	3731301	KIAA0562	Shore	exon	0.95	0.75
cg09357795	chr1	3731550	KIAA0562	Island	exon	0.66	0.9
cg10625090	chr1	3731643	KIAA0562	Island	exon	0.89	0.63
cg14833008	chr1	3731826	KIAA0562	Island	exon	0.96	0.67
cg14969320	chr1	3731835	KIAA0562	Island	exon	0.97	0.77
cg08642814	chr1	3734907	KIAA0562	Shelf	intron	0.94	0.76
cg20313677	chr1	3738610	KIAA0562	OpenSea	intron	0.91	0.69
cg12083024	chr1	3746511	KIAA0562	OpenSea	exon	0.97	0.81
cg22125220	chr1	3748957	KIAA0562	OpenSea	intron	0.97	0.83
cg03808734	chr1	3772978	DFFB	KIAA0562	Shore	intron	0.1	0.18
cg00905725	chr1	3773312	DFFB	KIAA0562	Island	intron	0.014	0.048
cg12679050	chr1	3773316	DFFB	KIAA0562	Island	intron	0.017	0.072
cg11416533	chr1	3773643	KIAA0562	DFFB	Island	exon	0.078	0.21
cg10444080	chr1	3773652	DFFB	KIAA0562	Island	exon	0.03	0.18
cg04835615	chr1	3773828	DFFB	KIAA0562	Island	upstream	0.045	0.096
cg14213620	chr1	3773909	DFFB	KIAA0562	Island	exon	0.023	0.1
cg22671931	chr1	3774853	KIAA0562	DFFB	Shore	intron	0.088	0.21
cg16964673	chr1	3775206	KIAA0562	DFFB	Island	intron	0.44	0.62
cg12744321	chr1	3775334	DFFB	Island	exon	0.86	0.94
cg15937266	chr1	3777197	DFFB	Shore	intron	0.93	0.78
cg17002428	chr1	3778271	DFFB	Shelf	intron	0.75	0.37
cg24578004	chr1	3787618	DFFB	Shelf	intron	0.92	0.66
cg00827239	chr1	3791597	DFFB	Island	intron	0.97	0.88
cg00461770	chr1	3792137	DFFB	Shore	intron	0.96	0.82
cg25190722	chr1	3801660	DFFB	OpenSea	exon	0.89	0.78
cg03921357	chr1	3809431	C1orf174	Shore	intron	0.29	0.57
cg27446570	chr1	3809532	C1orf174	Shore	exon	0.51	0.68
cg09757127	chr1	3810632	C1orf174	Shore	intron	0.9	0.48
cg24674024	chr1	3812177	C1orf174	Shelf	intron	0.85	0.9
cg03744522	chr1	3816447	C1orf174	LOC100133612	Island	intron	0.063	0.12
cg02659673	chr1	3817152	LOC100133612	C1orf174	Island	ncRNA	0.053	0.11
cg04343292	chr1	3817373	LOC100133612	C1orf174	Island	ncRNA	0.019	0.17
cg21833572	chr1	3817804	LOC100133612	C1orf174	Island	ncRNA	0.02	0.077
cg23698560	chr1	3822352	LOC100133612	Shore	ncRNA	0.95	0.77
cg13560072	chr1	3823704	LOC100133612	Shore	ncRNA	0.81	0.86
cg26248091	chr1	3824232	LOC100133612	Island	ncRNA	0.86	0.57
cg09228402	chr1	3824319	LOC100133612	Island	ncRNA	0.85	0.54
cg16162536	chr1	3824447	LOC100133612	Island	ncRNA	0.78	0.37
cg12279968	chr1	3826425	LOC100133612	Shore	ncRNA	0.79	0.59
cg26160564	chr1	3826643	LOC100133612	Shelf	ncRNA	0.83	0.58
cg09362969	chr1	3827065	LOC100133612	Shelf	ncRNA	0.58	0.55
cg08465307	chr1	3827081	LOC100133612	Shelf	ncRNA	0.55	0.44
cg21861174	chr1	3831314	LOC100133612	OpenSea	ncRNA	0.9	0.76
cg25468905	chr1	4000125		OpenSea	upstream	0.81	0.73
cg00647233	chr1	4000154		OpenSea	upstream	0.76	0.57
cg15598265	chr1	4004041		OpenSea	ncRNA	0.79	0.65
cg10950868	chr1	4004100		OpenSea	ncRNA	0.81	0.77
cg16679832	chr1	4008081		OpenSea	ncRNA	0.93	0.78
cg20011075	chr1	4008090		OpenSea	ncRNA	0.89	0.67
cg15061827	chr1	4015423		OpenSea	intergenic	0.88	0.71
cg12081443	chr1	4037236		OpenSea	intergenic	0.9	0.53
cg10510935	chr1	4059661		OpenSea	intergenic	0.46	0.41
cg26910994	chr1	4068470		OpenSea	intergenic	0.87	0.73
cg07115817	chr1	4068511		OpenSea	intergenic	0.94	0.74
cg25469923	chr1	4087182		OpenSea	intergenic	0.73	0.61
cg13443938	chr1	4087214		OpenSea	intergenic	0.56	0.23
cg16686279	chr1	4087226		OpenSea	intergenic	0.66	0.54
cg14785303	chr1	4119624		OpenSea	intergenic	0.89	0.61
cg13421041	chr1	4121820		OpenSea	intergenic	0.82	0.73
cg02897008	chr1	4188697		Shelf	intergenic	0.95	0.78
cg00542775	chr1	4188710		Shelf	intergenic	0.95	0.69
cg17899889	chr1	4191180		Shore	intergenic	0.74	0.55
cg13224197	chr1	4193192		Island	intergenic	0.84	0.72
cg06529149	chr1	4194412		Shore	intergenic	0.52	0.37
cg04094178	chr1	4195569		Shelf	intergenic	0.54	0.41
cg23953592	chr1	4219116		Shelf	intergenic	0.91	0.75
cg22016671	chr1	4221401		Island	intergenic	0.95	0.87
cg03972745	chr1	4222311		Shore	intergenic	0.79	0.64
cg12438155	chr1	4223893		Shelf	intergenic	0.7	0.49
cg22672716	chr1	4230760		OpenSea	intergenic	0.89	0.61
cg22040874	chr1	4230824		OpenSea	intergenic	0.85	0.64
cg23930133	chr1	4231220		OpenSea	intergenic	0.74	0.52
cg17808634	chr1	4275141		OpenSea	intergenic	0.84	0.67
cg10322419	chr1	4470956	LOC284661	OpenSea	intergenic	0.9	0.64
cg01388988	chr1	4472067	LOC284661	OpenSea	upstream	0.67	0.37
cg24735225	chr1	4472083	LOC284661	OpenSea	upstream	0.81	0.54
cg07248181	chr1	4472087	LOC284661	OpenSea	upstream	0.86	0.7
cg10378459	chr1	4482786	LOC284661	OpenSea	ncRNA	0.26	0.14
cg25195604	chr1	4485629		OpenSea	downstream	0.91	0.77
cg09269935	chr1	4541555		OpenSea	intergenic	0.79	0.58
cg21271015	chr1	4542704		OpenSea	intergenic	0.64	0.62
cg01720475	chr1	4542769		OpenSea	intergenic	0.9	0.73
cg16815850	chr1	4577320		OpenSea	intergenic	0.88	0.78
cg03312565	chr1	4577365		OpenSea	intergenic	0.57	0.45
cg16264595	chr1	4619207		OpenSea	intergenic	0.58	0.59
cg11735242	chr1	4644030		OpenSea	intergenic	0.75	0.62
cg01785490	chr1	4659688		OpenSea	intergenic	0.66	0.63
cg16906964	chr1	4660171		OpenSea	intergenic	0.58	0.39
cg00930781	chr1	4660565		OpenSea	intergenic	0.8	0.72
cg09278610	chr1	4661419		OpenSea	intergenic	0.7	0.72
cg26840333	chr1	4711419		Shelf	intergenic	0.77	0.46
cg12665669	chr1	4716313	AJAP1	Island	intron	0.034	0.079
cg02483484	chr1	4716537	AJAP1	Island	intron	0.041	0.13
cg14218042	chr1	4716578	AJAP1	Shore	intron	0.036	0.11
cg15549700	chr1	4722690	AJAP1	Shelf	intron	0.9	0.7
cg13503382	chr1	4726757	AJAP1	Island	intron	0.63	0.36
cg02482718	chr1	4726759	AJAP1	Island	intron	0.42	0.17
cg13056990	chr1	4736099	AJAP1	OpenSea	intron	0.81	0.64
cg24694502	chr1	4736187	AJAP1	OpenSea	intron	0.78	0.57
cg11380667	chr1	4749165	AJAP1	OpenSea	intron	0.8	0.53
cg24525286	chr1	4768404	AJAP1	Shelf	intron	0.82	0.58
cg15605704	chr1	4770676	AJAP1	Shore	intron	0.91	0.52
cg20624157	chr1	4772263	AJAP1	Island	exon	0.73	0.81
cg25198584	chr1	4775233	AJAP1	Shelf	intron	0.9	0.66
cg21267167	chr1	4786315	AJAP1	OpenSea	intron	0.75	0.65
cg21913897	chr1	4794072	AJAP1	OpenSea	intron	0.66	0.53
cg00562969	chr1	4815872	AJAP1	OpenSea	intron	0.53	0.29
cg22025570	chr1	4832352	AJAP1	Island	exon	0.86	0.73
cg06966242	chr1	4832432	AJAP1	Island	exon	0.67	0.5
cg10400362	chr1	4832549	AJAP1	Island	exon	0.9	0.73
cg21386545	chr1	4832865	AJAP1	Shore	intron	0.92	0.71
cg02771577	chr1	4834960	AJAP1	Shelf	intron	0.91	0.65
cg00859330	chr1	4835298	AJAP1	Shelf	intron	0.64	0.47
cg10222674	chr1	4837122	AJAP1	OpenSea	intron	0.85	0.73
cg26353694	chr1	4841940	AJAP1	OpenSea	intron	0.87	0.73
cg25552937	chr1	4842472	AJAP1	OpenSea	intron	0.88	0.76
cg00504341	chr1	4842718	AJAP1	OpenSea	exon	0.89	0.78
cg19628481	chr1	4844111		OpenSea	downstream	0.93	0.5
cg19821682	chr1	4849063		OpenSea	intergenic	0.69	0.54
cg11408632	chr1	4856487		OpenSea	intergenic	0.61	0.49
cg00972140	chr1	5037068		OpenSea	intergenic	0.95	0.79
cg09257020	chr1	5037097		OpenSea	intergenic	0.84	0.73
cg04621944	chr1	5080448		OpenSea	intergenic	0.8	0.39
cg06793402	chr1	5172759		OpenSea	intergenic	0.79	0.73
cg12468708	chr1	5220736		OpenSea	intergenic	0.9	0.75
cg11518454	chr1	5286091		OpenSea	intergenic	0.48	0.36
cg09234698	chr1	5334430		OpenSea	intergenic	0.84	0.39
cg24305579	chr1	5356578		OpenSea	intergenic	0.5	0.37
cg18224977	chr1	5398602		OpenSea	intergenic	0.56	0.39
cg13498778	chr1	5483364		OpenSea	intergenic	0.18	0.091
cg11966378	chr1	5483783		OpenSea	intergenic	0.88	0.67
cg25341687	chr1	5540602		OpenSea	intergenic	0.87	0.73
cg06371555	chr1	5540950		OpenSea	intergenic	0.91	0.86
cg11968318	chr1	5561995		OpenSea	intergenic	0.86	0.83
cg19403269	chr1	5569798		OpenSea	intergenic	0.82	0.46
cg18770052	chr1	5661886		OpenSea	intergenic	0.8	0.6
cg14605441	chr1	5772275		Island	intergenic	0.96	0.87
cg07311363	chr1	5773334		Shore	intergenic	0.81	0.7
cg00947686	chr1	5774259		Shore	intergenic	0.88	0.58
cg06721486	chr1	5790471		Shelf	intergenic	0.86	0.74
cg22374924	chr1	5791563		Shore	intergenic	0.53	0.28
cg16512667	chr1	5809346		OpenSea	intergenic	0.86	0.61
cg19265131	chr1	5812013		OpenSea	intergenic	0.78	0.44
cg23650244	chr1	5812892		OpenSea	intergenic	0.64	0.72
cg22012759	chr1	5816986		OpenSea	intergenic	0.63	0.71
cg06744481	chr1	5817321		OpenSea	intergenic	0.85	0.69
cg26606551	chr1	5817431		OpenSea	intergenic	0.85	0.76
cg25980388	chr1	5870397		OpenSea	intergenic	0.95	0.7
cg08133525	chr1	5870414		OpenSea	intergenic	0.96	0.78
cg15505277	chr1	5894894		OpenSea	intergenic	0.63	0.83
cg16617795	chr1	5895056		OpenSea	intergenic	0.81	0.7
cg23619890	chr1	5896050		OpenSea	intergenic	0.77	0.55
cg09317508	chr1	5896560		OpenSea	intergenic	0.65	0.56
cg19500334	chr1	5896653		OpenSea	intergenic	0.67	0.51
cg07928086	chr1	5907446		OpenSea	intergenic	0.33	0.2
cg24864189	chr1	5917766		OpenSea	intergenic	0.52	0.77
cg24883265	chr1	5917845		OpenSea	intergenic	0.42	0.57
cg23589237	chr1	5917915		OpenSea	intergenic	0.53	0.73
cg06156296	chr1	5918693		OpenSea	intergenic	0.96	0.81
cg16176837	chr1	5919155		OpenSea	intergenic	0.87	0.92
cg14969806	chr1	5919854		OpenSea	intergenic	0.98	0.79
cg00258499	chr1	5920035		OpenSea	intergenic	0.96	0.79
cg14559147	chr1	5920463		OpenSea	intergenic	0.92	0.74
cg02275243	chr1	5920514		OpenSea	intergenic	0.9	0.59
cg05302064	chr1	5922686		OpenSea	downstream	0.91	0.64
cg22682724	chr1	5922731		OpenSea	downstream	0.94	0.8
cg13857472	chr1	5923174	NPHP4	OpenSea	exon	0.84	0.9
cg13396716	chr1	5923309	NPHP4	OpenSea	exon	0.95	0.82
cg10719852	chr1	5923909	NPHP4	OpenSea	intron	0.88	0.51
cg27233192	chr1	5925859	NPHP4	OpenSea	intron	0.94	0.81
cg26661089	chr1	5931389	NPHP4	OpenSea	intron	0.98	0.85
cg19762508	chr1	5931428	NPHP4	OpenSea	intron	0.95	0.84
cg24886027	chr1	5932678	NPHP4	OpenSea	intron	0.96	0.81
cg15483030	chr1	5935144	NPHP4	Shelf	exon	0.98	0.95
cg03607993	chr1	5936617	NPHP4	Shore	intron	0.97	0.81
cg17026763	chr1	5940173	NPHP4	Shelf	exon	0.87	0.55
cg15466571	chr1	5940692	NPHP4	Shelf	intron	0.87	0.93
cg16430402	chr1	5947386	NPHP4	Shelf	exon	0.98	0.75
cg01074955	chr1	5948555	NPHP4	Shelf	intron	0.95	0.46
cg00385956	chr1	5948600	NPHP4	Shelf	intron	0.97	0.81
cg05463119	chr1	5951028	NPHP4	Island	exon	0.98	0.9
cg20806172	chr1	5953106	NPHP4	Shelf	intron	0.81	0.59
cg16258229	chr1	5956985	NPHP4	OpenSea	intron	0.36	0.5
cg11798758	chr1	5957004	NPHP4	OpenSea	intron	0.46	0.62
cg08893598	chr1	5958381	NPHP4	OpenSea	intron	0.94	0.8
cg15893285	chr1	5958699	NPHP4	OpenSea	intron	0.99	0.83
cg08882503	chr1	5959093	NPHP4	OpenSea	intron	0.88	0.68
cg24693635	chr1	5968728	NPHP4	OpenSea	intron	0.69	0.83
cg15324288	chr1	5971510	NPHP4	OpenSea	intron	0.73	0.43
cg19804525	chr1	5972074	NPHP4	OpenSea	intron	0.95	0.82
cg07829001	chr1	6005092	NPHP4	OpenSea	intron	0.97	0.82
cg22356839	chr1	6011302	NPHP4	OpenSea	intron	0.98	0.94
cg15550953	chr1	6036414	NPHP4	OpenSea	intron	0.82	0.88
cg25035489	chr1	6036550	NPHP4	OpenSea	intron	0.83	0.92
cg07517005	chr1	6051606	NPHP4	Island	intron	0.0092	0.051
cg00069017	chr1	6051640	NPHP4	Island	intron	0.058	0.24
cg00931619	chr1	6052495	NPHP4	Island	exon	0.012	0.082
cg20797142	chr1	6052500	NPHP4	Island	exon	0.0094	0.054
cg12904950	chr1	6052770	NPHP4	Island	exon	0.028	0.16
cg08622934	chr1	6054784		Shore	intron	0.74	0.38
cg02841875	chr1	6056063		Shelf	intron	0.88	0.94
cg05307871	chr1	6059070		OpenSea	intron	0.96	0.64
cg20414505	chr1	6061279		OpenSea	intron	0.93	0.76
cg04088152	chr1	6062462		OpenSea	intron	0.39	0.6
cg13069237	chr1	6063456		OpenSea	intron	0.9	0.92
cg03895593	chr1	6064094		OpenSea	intron	0.31	0.56
cg26564960	chr1	6082758		Shelf	intron	0.77	0.56
cg13614083	chr1	6085872	KCNAB2	Shore	intron	0.91	0.73
cg12604162	chr1	6086148	KCNAB2	Shore	exon	0.6	0.35
cg11740026	chr1	6093770	KCNAB2	OpenSea	intron	0.42	0.3
cg00043790	chr1	6093972	KCNAB2	OpenSea	intron	0.68	0.38
cg11185792	chr1	6097703	KCNAB2	OpenSea	intron	0.69	0.54
cg00352913	chr1	6105324	KCNAB2	OpenSea	intron	0.75	0.9
cg15731035	chr1	6106539	KCNAB2	OpenSea	intron	0.85	0.59
cg22235088	chr1	6111835	KCNAB2	Island	intron	0.73	0.5
cg20814688	chr1	6132879	KCNAB2	Shore	intron	0.96	0.83
cg00773460	chr1	6133428	KCNAB2	Shore	intron	0.71	0.55
cg06118571	chr1	6137768	KCNAB2	OpenSea	intron	0.65	0.52
cg25880365	chr1	6137955	KCNAB2	OpenSea	intron	0.95	0.72
cg24545495	chr1	6149049	KCNAB2	OpenSea	intron	0.92	0.64
cg24152353	chr1	6149107	KCNAB2	OpenSea	exon	0.94	0.81
cg13243674	chr1	6149444	KCNAB2	OpenSea	intron	0.93	0.87
cg26858423	chr1	6149477	KCNAB2	OpenSea	intron	0.89	0.64
cg00055881	chr1	6153073	KCNAB2	OpenSea	intron	0.88	0.83
cg03549532	chr1	6154081	KCNAB2	OpenSea	intron	0.87	0.94
cg24641417	chr1	6154454	KCNAB2	OpenSea	intron	0.96	0.85
cg14258756	chr1	6158059	KCNAB2	OpenSea	intron	0.9	0.54
cg16053064	chr1	6158643	KCNAB2	OpenSea	exon	0.74	0.53
cg21776674	chr1	6160143	KCNAB2	OpenSea	exon	0.75	0.57
cg00347918	chr1	6162744	CHD5	OpenSea	exon	0.87	0.62
cg13103815	chr1	6164020	CHD5	OpenSea	exon	0.58	0.46
cg21164697	chr1	6188946	CHD5	Island	exon	0.96	0.85
cg20745153	chr1	6188985	CHD5	Island	exon	0.85	0.79
cg00913953	chr1	6189040	CHD5	Island	exon	0.97	0.91
cg03960382	chr1	6190318	CHD5	Shore	exon	0.93	0.75
cg15125762	chr1	6191870	CHD5	Shelf	intron	0.59	0.48
cg05371688	chr1	6191879	CHD5	Shelf	intron	0.65	0.43
cg03770108	chr1	6192111	CHD5	Shelf	intron	0.87	0.84
cg20817257	chr1	6197037	CHD5	OpenSea	intron	0.73	0.46
cg05591769	chr1	6197050	CHD5	OpenSea	intron	0.76	0.61
cg20993163	chr1	6198104	CHD5	OpenSea	intron	0.8	0.65
cg17133774	chr1	6198667	CHD5	Shelf	intron	0.41	0.34
cg01335566	chr1	6200312	CHD5	Shore	intron	0.72	0.48
cg27312709	chr1	6202080	CHD5	Shore	intron	0.87	0.59
cg15727545	chr1	6205418	CHD5	Shelf	intron	0.64	0.57
cg18391058	chr1	6207067	CHD5	Shore	intron	0.89	0.83
cg01055025	chr1	6226998	CHD5	OpenSea	intron	0.77	0.41
cg17479763	chr1	6237002	CHD5	Shelf	intron	0.46	0.24
cg15578645	chr1	6239157	CHD5	Shore	intron	0.11	0.22
cg13851144	chr1	6239475	CHD5	Island	intron	0.053	0.13
cg08080029	chr1	6239970	CHD5	Island	intron	0.042	0.26
cg16519705	chr1	6240038	CHD5	Island	exon	0.047	0.098
cg17724171	chr1	6240267	CHD5	Island	upstream	0.049	0.21
cg22902824	chr1	6240271	CHD5	Island	upstream	0.028	0.1
cg23730387	chr1	6246236	RPL22	OpenSea	exon	0.93	0.77
cg06744003	chr1	6255635	RPL22	Shelf	intron	0.95	0.78
cg22174623	chr1	6257379	RPL22	Shore	intron	0.8	0.35
cg21393421	chr1	6259179	RPL22	Island	intron	0.044	0.26
cg04025728	chr1	6259688	RPL22	Island	upstream	0.011	0.056
cg16178974	chr1	6259704	RPL22	Island	upstream	0.013	0.093
cg12967293	chr1	6259874	RPL22	Island	upstream	0.042	0.11
cg14303330	chr1	6259905	RPL22	Shore	upstream	0.02	0.11
cg17153174	chr1	6261146	RPL22	Shore	intergenic	0.97	0.81
cg03734402	chr1	6265417	RNF207	Shore	ncRNA	0.068	0.2
cg02077561	chr1	6270963	RNF207	Shore	exon	0.88	0.93
cg01517656	chr1	6272055	RNF207	Shelf	exon	0.96	0.87
cg26611832	chr1	6279843	RNF207	OpenSea	exon	0.72	0.47
cg14287788	chr1	6284844	ICMT	OpenSea	exon	0.98	0.89
cg17900884	chr1	6296090	ICMT	Island	upstream	0.015	0.052
cg15582719	chr1	6296260	ICMT	Island	upstream	0.031	0.14
cg14089881	chr1	6296630	ICMT	Shore	ncRNA	0.64	0.39
cg06940574	chr1	6297128	ICMT	Shore	ncRNA	0.98	0.89
cg15830682	chr1	6298637		Shelf	ncRNA	0.98	0.88
cg21413219	chr1	6299374		Shelf	ncRNA	0.48	0.3
cg05347736	chr1	6302164		Island	intergenic	0.065	0.17
cg26912877	chr1	6305344	HES3	Island	exon	0.036	0.084
cg26257210	chr1	6305348	HES3	Island	exon	0.085	0.21
cg02041944	chr1	6306270		Island	downstream	0.087	0.043
cg08207378	chr1	6313762	GPR153	Island	intron	0.91	0.66
cg01909982	chr1	6320450	GPR153	Island	intron	0.031	0.12
cg14958889	chr1	6320471	GPR153	Island	intron	0.045	0.15
cg02892189	chr1	6321676	GPR153	Shore	upstream	0.12	0.26
cg08848865	chr1	6324897	ACOT7	Shelf	intron	0.85	0.65
cg08679807	chr1	6338594	ACOT7	Shore	intron	0.61	0.39
cg04354126	chr1	6338812	ACOT7	Shore	intron	0.9	0.63
cg09887323	chr1	6348460	ACOT7	OpenSea	intron	0.65	0.75
cg23230478	chr1	6360620	ACOT7	OpenSea	intron	0.94	0.47
cg04309375	chr1	6363886	ACOT7	OpenSea	intron	0.5	0.69
cg24601967	chr1	6366496	ACOT7	OpenSea	intron	0.95	0.8
cg18222440	chr1	6366658	ACOT7	OpenSea	intron	0.97	0.91
cg22171613	chr1	6396134	ACOT7	OpenSea	intron	0.47	0.65
cg05591235	chr1	6405672	ACOT7	OpenSea	intron	0.86	0.92
cg10375954	chr1	6419608	ACOT7	OpenSea	intron	0.54	0.31
cg12082302	chr1	6421246	ACOT7	OpenSea	intron	0.94	0.82
cg18148314	chr1	6425319	ACOT7	OpenSea	intron	0.89	0.57
cg10770046	chr1	6446787	ACOT7	OpenSea	intron	0.88	0.65
cg19267259	chr1	6453427	ACOT7	Island	exon	0.027	0.14
cg22346119	chr1	6453452	ACOT7	Island	exon	0.022	0.11
cg08889373	chr1	6454109	ACOT7	Island	upstream	0.059	0.24
cg05944661	chr1	6457799		Shelf	intergenic	0.69	0.6
cg05594095	chr1	6476916	HES2	Shelf	exon	0.85	0.74
cg14832908	chr1	6479424	HES2	Island	intron	0.28	0.15
cg23040649	chr1	6479813	HES2	Island	intron	0.028	0.11
cg00549463	chr1	6480232	HES2	Island	upstream	0.065	0.14
cg25352592	chr1	6481151	HES2	Shore	intergenic	0.66	0.43
cg15718222	chr1	6483926	ESPN	Shore	upstream	0.092	0.26
cg00297432	chr1	6484784	ESPN	Island	upstream	0.41	0.61
cg24153044	chr1	6485201	ESPN	Island	exon	0.42	0.19
cg10949430	chr1	6496243	ESPN	Shelf	intron	0.63	0.79
cg04871364	chr1	6501062	ESPN	Island	exon	0.6	0.54
cg16414143	chr1	6507490	ESPN	Island	intron	0.32	0.21
cg20248421	chr1	6507979	ESPN	Island	intron	0.24	0.13
cg19809453	chr1	6508028	ESPN	Island	intron	0.24	0.12
cg25097074	chr1	6508954	ESPN	Island	exon	0.022	0.074
cg13326801	chr1	6509182	ESPN	Island	intron	0.23	0.19
cg16672535	chr1	6510652	ESPN	Shore	intron	0.74	0.53
cg23588699	chr1	6521892	TNFRSF25	Island	intron	0.98	0.75
cg02988775	chr1	6524642	TNFRSF25	Shore	exon	0.63	0.82
cg02084087	chr1	6526049	TNFRSF25	Island	intron	0.72	0.3
cg15205428	chr1	6526051	TNFRSF25	Island	intron	0.74	0.41
cg08091596	chr1	6530743	PLEKHG5	Island	intron	0.65	0.78
cg06816518	chr1	6531152	PLEKHG5	Island	exon	0.86	0.94
cg27428051	chr1	6534879	PLEKHG5	Shelf	intron	0.86	0.42
cg12738078	chr1	6538417	PLEKHG5	OpenSea	intron	0.88	0.68
cg17151560	chr1	6544511	PLEKHG5	Shore	intron	0.8	0.87
cg17589124	chr1	6546732	PLEKHG5	Shore	intron	0.034	0.15
cg11432443	chr1	6548491	PLEKHG5	Shore	intron	0.94	0.74
cg05128003	chr1	6548963	PLEKHG5	Shore	intron	0.78	0.51
cg08477740	chr1	6550680	PLEKHG5	Island	intron	0.016	0.081
cg00253564	chr1	6552403	PLEKHG5	Shore	intron	0.67	0.8
cg17137063	chr1	6554877	PLEKHG5	Shelf	intron	0.53	0.76
cg01429933	chr1	6556248	PLEKHG5	Shore	intron	0.47	0.54
cg18810133	chr1	6557779	PLEKHG5	Island	intron	0.023	0.06
cg03778981	chr1	6557871	PLEKHG5	Island	intron	0.019	0.19
cg06347632	chr1	6558497	PLEKHG5	Shore	intron	0.69	0.44
cg07795452	chr1	6565177	PLEKHG5	OpenSea	intron	0.9	0.74
cg26030470	chr1	6566138	PLEKHG5	OpenSea	intron	0.93	0.69
cg04601090	chr1	6579837	PLEKHG5	OpenSea	exon	0.5	0.69
cg12302560	chr1	6611319	NOL9	Shelf	intron	0.89	0.54
cg03046264	chr1	6614344	TAS1R1	NOL9	Island	exon	0.013	0.071
cg07399635	chr1	6614658	TAS1R1	NOL9	Island	exon	0.07	0.24
cg05086993	chr1	6614664	TAS1R1	NOL9	Island	upstream	0.011	0.084
cg22792644	chr1	6614718	TAS1R1	NOL9	Island	upstream	0.12	0.33
cg09513309	chr1	6614775	TAS1R1	NOL9	Island	upstream	0.091	0.19
cg07997941	chr1	6614800	TAS1R1	NOL9	Island	upstream	0.07	0.18
cg09132215	chr1	6615264	TAS1R1	NOL9	Shore	upstream	0.39	0.78
cg00741410	chr1	6615354	TAS1R1	NOL9	Shore	exon	0.42	0.63
cg24105407	chr1	6615510	TAS1R1	NOL9	Shore	exon	0.29	0.61
cg27531553	chr1	6615604	TAS1R1	NOL9	Shore	exon	0.3	0.48
cg21547845	chr1	6618814	TAS1R1	Shelf	intron	0.41	0.2
cg14186992	chr1	6639570	ZBTB48	TAS1R1	Island	exon	0.6	0.79
cg19508900	chr1	6639738	TAS1R1	ZBTB48	Island	exon	0.078	0.21
cg03699618	chr1	6639892	ZBTB48	Island	up/downstream	0.036	0.14
cg27044593	chr1	6639904	ZBTB48	Island	up/downstream	0.014	0.076
cg22431590	chr1	6639959	ZBTB48	Island	up/downstream	0.026	0.084
cg09143576	chr1	6640149	ZBTB48	Island	exon	0.027	0.12
cg23642826	chr1	6645463	ZBTB48	OpenSea	intron	0.71	0.84
cg24809958	chr1	6662478	KLHL21	Island	exon	0.043	0.042
cg25479082	chr1	6662996	KLHL21	Island	upstream	0.022	0.092
cg08653114	chr1	6666662		Shelf	intergenic	0.72	0.45
cg22040963	chr1	6673001	PHF13	Island	upstream	0.025	0.13
cg01606324	chr1	6673327	PHF13	Island	upstream	0.033	0.11
cg04497520	chr1	6673429	PHF13	Island	upstream	0.03	0.11
cg01433443	chr1	6673467	PHF13	Island	upstream	0.051	0.18
cg08661290	chr1	6674110	PHF13	Island	exon	0.07	0.22
cg05892930	chr1	6675543	PHF13	Island	intron	0.033	0.1
cg05377512	chr1	6681647	PHF13	Shelf	exon	0.98	0.91
cg15158876	chr1	6681878	PHF13	Shelf	exon	0.86	0.93
cg11688219	chr1	6684919	THAP3	Shore	up/downstream	0.011	0.1
cg24312985	chr1	6684957	THAP3	Shore	exon	0.22	0.46
cg27300967	chr1	6685162	THAP3	Island	intron	0.024	0.18
cg08250099	chr1	6685624	THAP3	Island	intron	0.015	0.06
cg17946470	chr1	6685935	THAP3	Shore	intron	0.025	0.1
cg20060759	chr1	6694392	THAP3	DNAJC11	OpenSea	exon	0.63	0.8
cg12218771	chr1	6696166	DNAJC11	OpenSea	intron	0.87	0.93
cg26361757	chr1	6706713	DNAJC11	OpenSea	intron	0.19	0.23
cg24361350	chr1	6750722	DNAJC11	OpenSea	intron	0.9	0.68
cg20668607	chr1	6762257	DNAJC11	Shore	upstream	0.69	0.51
cg22377182	chr1	6762600	DNAJC11	Shore	upstream	0.98	0.78
cg26360953	chr1	6784749		OpenSea	upstream	0.87	0.68
cg00644847	chr1	6787585		OpenSea	ncRNA	0.68	0.39
cg00565932	chr1	6789917		OpenSea	ncRNA	0.86	0.5
cg23229610	chr1	6841125		Shelf	intergenic	0.89	0.53
cg25003534	chr1	6844314	CAMTA1	Island	intergenic	0.028	0.086
cg12644588	chr1	6845214	CAMTA1	Island	upstream	0.037	0.15
cg16414762	chr1	6845247	CAMTA1	Island	upstream	0.037	0.18
cg19820248	chr1	6845373	CAMTA1	Island	upstream	0.015	0.074
cg18230417	chr1	6845419	CAMTA1	Island	exon	0.048	0.11
cg06816875	chr1	6845440	CAMTA1	Island	exon	0.025	0.16
cg12608643	chr1	6847673	CAMTA1	Shore	intron	0.9	0.66
cg04874074	chr1	6855140	CAMTA1	OpenSea	intron	0.85	0.52
cg15061086	chr1	6870250	CAMTA1	OpenSea	intron	0.95	0.76
cg25625600	chr1	6919841	CAMTA1	OpenSea	intron	0.71	0.59
cg03051946	chr1	6946515	CAMTA1	OpenSea	intron	0.89	0.6
cg16582836	chr1	6952297	CAMTA1	OpenSea	intron	0.95	0.8
cg17973385	chr1	6958900	CAMTA1	OpenSea	intron	0.94	0.84
cg24117315	chr1	6988185	CAMTA1	OpenSea	intron	0.85	0.57
cg27551706	chr1	7015944	CAMTA1	OpenSea	intron	0.83	0.64
cg13362033	chr1	7018949	CAMTA1	Shelf	intron	0.89	0.64
cg26152704	chr1	7024757	CAMTA1	Shelf	intron	0.92	0.76
cg04353586	chr1	7039323	CAMTA1	OpenSea	intron	0.86	0.6
cg22392325	chr1	7049418	CAMTA1	OpenSea	intron	0.98	0.8
cg11680212	chr1	7056193	CAMTA1	OpenSea	intron	0.81	0.57
cg10321026	chr1	7104475	CAMTA1	OpenSea	intron	0.8	0.47
cg05710479	chr1	7120104	CAMTA1	Shelf	intron	0.93	0.81
cg06149271	chr1	7120893	CAMTA1	Shore	intron	0.55	0.38
cg07364396	chr1	7122541	CAMTA1	Island	intron	0.93	0.58
cg14083421	chr1	7122639	CAMTA1	Island	intron	0.86	0.51
cg05718034	chr1	7122667	CAMTA1	Island	intron	0.89	0.62
cg07008478	chr1	7122798	CAMTA1	Shore	intron	0.86	0.75
cg24844717	chr1	7123191	CAMTA1	Shore	intron	0.95	0.77
cg24579970	chr1	7123315	CAMTA1	Shore	intron	0.83	0.65
cg17816038	chr1	7123346	CAMTA1	Shore	intron	0.85	0.75
cg04215950	chr1	7125137	CAMTA1	Shelf	intron	0.78	0.79
cg05129050	chr1	7178026	CAMTA1	OpenSea	intron	0.23	0.22
cg09148344	chr1	7180862	CAMTA1	OpenSea	intron	0.95	0.77
cg20999755	chr1	7184726	CAMTA1	OpenSea	intron	0.9	0.64
cg10332321	chr1	7184783	CAMTA1	OpenSea	intron	0.95	0.77
cg10511357	chr1	7196075	CAMTA1	OpenSea	intron	0.83	0.7
cg00833688	chr1	7210116	CAMTA1	OpenSea	intron	0.84	0.66
cg03580787	chr1	7271353	CAMTA1	OpenSea	intron	0.86	0.66
cg26253070	chr1	7284226	CAMTA1	OpenSea	intron	0.85	0.51
cg00665827	chr1	7293835	CAMTA1	OpenSea	intron	0.79	0.57
cg06789545	chr1	7294361	CAMTA1	OpenSea	intron	0.94	0.8
cg12097989	chr1	7311176	CAMTA1	OpenSea	intron	0.84	0.55
cg10521808	chr1	7313750	CAMTA1	OpenSea	intron	0.94	0.83
cg00292312	chr1	7318138	CAMTA1	OpenSea	intron	0.72	0.56
cg23723194	chr1	7318905	CAMTA1	OpenSea	intron	0.94	0.84
cg26920627	chr1	7319248	CAMTA1	OpenSea	intron	0.85	0.63
cg06081557	chr1	7374135	CAMTA1	OpenSea	intron	0.91	0.69
cg19164131	chr1	7393686	CAMTA1	OpenSea	intron	0.78	0.48
cg23110353	chr1	7402097	CAMTA1	OpenSea	intron	0.95	0.73
cg14794741	chr1	7408911	CAMTA1	OpenSea	intron	0.75	0.48
cg25345659	chr1	7409003	CAMTA1	OpenSea	intron	0.51	0.2
cg05650453	chr1	7432644	CAMTA1	OpenSea	intron	0.94	0.76
cg19809052	chr1	7485186	CAMTA1	OpenSea	intron	0.94	0.81
cg25974448	chr1	7492376	CAMTA1	OpenSea	intron	0.93	0.85
cg26810970	chr1	7497704	CAMTA1	OpenSea	intron	0.81	0.54
cg26161885	chr1	7510190	CAMTA1	OpenSea	intron	0.9	0.81
cg06077003	chr1	7543471	CAMTA1	OpenSea	intron	0.83	0.58
cg10536786	chr1	7550036	CAMTA1	OpenSea	intron	0.88	0.7
cg09182435	chr1	7579016	CAMTA1	OpenSea	intron	0.62	0.44
cg18795022	chr1	7587410	CAMTA1	OpenSea	intron	0.81	0.56
cg26677075	chr1	7591674	CAMTA1	OpenSea	intron	0.87	0.62
cg25770267	chr1	7596685	CAMTA1	OpenSea	intron	0.83	0.54
cg11525548	chr1	7611041	CAMTA1	OpenSea	intron	0.79	0.57
cg05048259	chr1	7622560	CAMTA1	OpenSea	intron	0.9	0.53
cg06800235	chr1	7692367	CAMTA1	OpenSea	intron	0.77	0.54
cg01919912	chr1	7700578	CAMTA1	OpenSea	exon	0.79	0.9
cg25196088	chr1	7703835	CAMTA1	OpenSea	intron	0.84	0.65
cg09272702	chr1	7706193	CAMTA1	OpenSea	intron	0.92	0.58
cg05708629	chr1	7707865	CAMTA1	OpenSea	intron	0.79	0.55
cg18180609	chr1	7710719	CAMTA1	OpenSea	intron	0.91	0.79
cg02294758	chr1	7710738	CAMTA1	OpenSea	intron	0.93	0.81
cg24107453	chr1	7720977	CAMTA1	Shelf	intron	0.86	0.64
cg10434624	chr1	7722876	CAMTA1	Shore	intron	0.87	0.74
cg21942218	chr1	7723420	CAMTA1	Island	exon	0.98	0.94
cg22127730	chr1	7724533	CAMTA1	Island	exon	0.94	0.66
cg19864048	chr1	7736509	CAMTA1	Shelf	intron	0.93	0.77
cg24294989	chr1	7740715	CAMTA1	Island	intron	0.049	0.11
cg14278614	chr1	7740806	CAMTA1	Island	intron	0.049	0.12
cg25763306	chr1	7741216	CAMTA1	Shore	intron	0.22	0.22
cg19248302	chr1	7745081	CAMTA1	Shelf	intron	0.96	0.71
cg04128092	chr1	7747160	CAMTA1	OpenSea	intron	0.94	0.62
cg23228279	chr1	7757374	CAMTA1	OpenSea	intron	0.93	0.8
cg09068636	chr1	7760717	CAMTA1	Shelf	intron	0.94	0.7
cg08640609	chr1	7764642	CAMTA1	Island	intron	0.016	0.083
cg01373292	chr1	7764737	CAMTA1	Island	intron	0.044	0.12
cg00329748	chr1	7765245	CAMTA1	Island	intron	0.052	0.23
cg09696653	chr1	7765353	CAMTA1	Island	intron	0.022	0.11
cg15211499	chr1	7765369	CAMTA1	Island	intron	0.022	0.071
cg14157073	chr1	7765564	CAMTA1	Island	intron	0.2	0.39
cg06082897	chr1	7767716	CAMTA1	Shore	intron	0.84	0.71
cg08941669	chr1	7778234	CAMTA1	OpenSea	intron	0.96	0.81
cg17081408	chr1	7778321	CAMTA1	OpenSea	intron	0.94	0.73
cg00425885	chr1	7792442	CAMTA1	OpenSea	intron	0.88	0.65
cg25132484	chr1	7796345	CAMTA1	OpenSea	intron	0.97	0.9
cg25132772	chr1	7796553	CAMTA1	OpenSea	exon	0.93	0.83
cg12138124	chr1	7797432	CAMTA1	OpenSea	exon	0.94	0.71
cg06712362	chr1	7811235	CAMTA1	OpenSea	intron	0.97	0.89
cg08890097	chr1	7811352	CAMTA1	OpenSea	exon	0.94	0.74
cg03849780	chr1	7816037	CAMTA1	OpenSea	intron	0.67	0.42
cg21285926	chr1	7829296	CAMTA1	Shelf	exon	0.97	0.77
cg13488186	chr1	7830103	VAMP3	Shore	downstream	0.95	0.85
cg05661441	chr1	7830134	VAMP3	Shore	downstream	0.94	0.83
cg01078174	chr1	7830468	VAMP3	Shore	up/downstream	0.92	0.69
cg26816564	chr1	7831052	VAMP3	Shore	upstream	0.052	0.13
cg14993123	chr1	7831245	VAMP3	Shore	upstream	0.017	0.14
cg07148645	chr1	7831318	VAMP3	Shore	upstream	0.03	0.098
cg20149362	chr1	7834809	VAMP3	Shelf	intron	0.72	0.22
cg26884320	chr1	7837315	VAMP3	OpenSea	exon	0.97	0.88
cg06722397	chr1	7839884	VAMP3	Shelf	exon	0.95	0.73
cg13322290	chr1	7841088	VAMP3	Shelf	exon	0.92	0.67
cg02277850	chr1	7842393		Shore	downstream	0.75	0.45
cg06487986	chr1	7843564	PER3	Island	upstream	0.028	0.11
cg23927002	chr1	7843618	PER3	Island	upstream	0.037	0.12
cg11753033	chr1	7843975	PER3	Island	upstream	0.033	0.13
cg08764927	chr1	7844895	PER3	Island	exon	0.69	0.67
cg22507406	chr1	7867939	PER3	OpenSea	intron	0.92	0.74
cg04837231	chr1	7885239	PER3	Shore	intron	0.72	0.42
cg09168692	chr1	7887560	PER3	Shore	exon	0.68	0.84
cg00019458	chr1	7887942	PER3	Shore	intron	0.93	0.77
cg11668188	chr1	7891116	PER3	Shelf	intron	0.93	0.73
cg11978441	chr1	7902772	PER3	OpenSea	exon	0.94	0.84
cg26405913	chr1	7911209	UTS2	OpenSea	intron	0.92	0.78
cg09938876	chr1	7913865	UTS2	OpenSea	upstream	0.95	0.87
cg12606891	chr1	7913872	UTS2	OpenSea	upstream	0.87	0.63
cg15727920	chr1	7914017	UTS2	OpenSea	upstream	0.87	0.49
cg17861477	chr1	7914143	UTS2	OpenSea	upstream	0.58	0.4
cg14614416	chr1	8001252	TNFRSF9	Shore	intron	0.9	0.6
cg18859763	chr1	8002528		Island	intron	0.12	0.25
cg22677498	chr1	8004329		Shore	intergenic	0.87	0.72
cg26118643	chr1	8009079		OpenSea	intergenic	0.8	0.55
cg17425224	chr1	8021250	PARK7	Shore	upstream	0.014	0.076
cg10514638	chr1	8021611	PARK7	Island	upstream	0.016	0.084
cg16136678	chr1	8021749	PARK7	Island	exon	0.037	0.17
cg25007680	chr1	8021821	PARK7	Island	exon	0.021	0.15
cg26437866	chr1	8045238	PARK7	OpenSea	exon	0.96	0.64
cg08719370	chr1	8052412		OpenSea	intergenic	0.96	0.75
cg22122925	chr1	8073906	ERRFI1	OpenSea	exon	0.93	0.43
cg14178899	chr1	8076599	ERRFI1	OpenSea	intron	0.86	0.41
cg17477995	chr1	8085641	ERRFI1	Island	intron	0.1	0.22
cg06159484	chr1	8087590	ERRFI1	Shore	intergenic	0.94	0.8
cg15631343	chr1	8090712		Shelf	intergenic	0.96	0.75
cg24309171	chr1	8100226		OpenSea	intergenic	0.95	0.81
cg19698200	chr1	8121893		OpenSea	intergenic	0.98	0.87
cg22171607	chr1	8137564		OpenSea	intergenic	0.8	0.57
cg18376288	chr1	8181555		OpenSea	intergenic	0.14	0.28
cg00258316	chr1	8194341		OpenSea	intergenic	0.64	0.38
cg20244489	chr1	8209787		OpenSea	intergenic	0.85	0.67
cg05270224	chr1	8212843		OpenSea	intergenic	0.85	0.38
cg11734367	chr1	8213978		OpenSea	intergenic	0.97	0.87
cg11977919	chr1	8263776		OpenSea	intergenic	0.98	0.91
cg20014974	chr1	8271918		Shore	ncRNA	0.6	0.51
cg02847588	chr1	8271997		Island	ncRNA	0.75	0.61
cg06780032	chr1	8272277		Shore	ncRNA	0.59	0.51
cg16060382	chr1	8278295		Shore	intergenic	0.84	0.66
cg07021405	chr1	8292657		OpenSea	intergenic	0.92	0.79
cg04508870	chr1	8298617		OpenSea	intergenic	0.73	0.6
cg00059459	chr1	8343575		OpenSea	intergenic	0.78	0.38
cg26248537	chr1	8376216		Shore	intergenic	0.89	0.91
cg23768131	chr1	8376931		Shore	intergenic	0.62	0.8
cg26407930	chr1	8377724		Shore	upstream	0.76	0.45
cg25190638	chr1	8383169	SLC45A1	Shore	intron	0.85	0.43
cg00184512	chr1	8383636	SLC45A1	Shore	intron	0.95	0.88
cg07958878	chr1	8384595	SLC45A1	Island	exon	0.9	0.63
cg10508347	chr1	8384659	SLC45A1	Island	exon	0.91	0.63
cg00139056	chr1	8385396	SLC45A1	Shore	exon	0.97	0.84
cg19847936	chr1	8385896	SLC45A1	Island	exon	0.97	0.77
cg09787123	chr1	8385927	SLC45A1	Island	exon	0.97	0.88
cg24660836	chr1	8386013	SLC45A1	Island	exon	0.97	0.89
cg24550298	chr1	8386089	SLC45A1	Island	exon	0.88	0.69
cg26543352	chr1	8386571	SLC45A1	Shore	intron	0.97	0.9
cg06622404	chr1	8388620	SLC45A1	Shore	intron	0.95	0.73
cg04230253	chr1	8390746	SLC45A1	Island	exon	0.97	0.91
cg19081390	chr1	8393978	SLC45A1	Shore	intron	0.82	0.55
cg03886520	chr1	8395396	SLC45A1	Island	intron	0.94	0.78
cg07908574	chr1	8396933	SLC45A1	Shore	intron	0.89	0.71
cg02460223	chr1	8398664	SLC45A1	Shelf	intron	0.86	0.64
cg04994795	chr1	8404050	SLC45A1	Island	exon	0.77	0.56
cg21545013	chr1	8407891		Shelf	intergenic	0.75	0.83
cg24471980	chr1	8416911	RERE	Shore	intron	0.93	0.77
cg13084560	chr1	8418823	RERE	Island	exon	0.97	0.85
cg09117622	chr1	8421278	RERE	Shelf	exon	0.94	0.63
cg17861150	chr1	8425258	RERE	OpenSea	intron	0.97	0.89
cg01771201	chr1	8427556	RERE	OpenSea	intron	0.85	0.89
cg09868496	chr1	8454006	RERE	OpenSea	intron	0.88	0.65
cg00786138	chr1	8470722	RERE	OpenSea	intron	0.96	0.81
cg08856919	chr1	8484157	RERE	Island	intron	0.02	0.1
cg23843414	chr1	8484310	RERE	Island	intron	0.039	0.43
cg25001161	chr1	8484338	RERE	Island	intron	0.023	0.097
cg27561786	chr1	8525010	RERE	OpenSea	intron	0.93	0.85
cg14380444	chr1	8577534	RERE	OpenSea	intron	0.47	0.3
cg09635768	chr1	8601318	RERE	OpenSea	exon	0.79	0.39
cg20609715	chr1	8658581	RERE	OpenSea	intron	0.3	0.6
cg17442683	chr1	8664311	RERE	OpenSea	intron	0.79	0.59
cg23092527	chr1	8703002	RERE	OpenSea	intron	0.96	0.82
cg09808028	chr1	8712546	RERE	OpenSea	intron	0.54	0.31
cg15519465	chr1	8738385	RERE	OpenSea	intron	0.81	0.39
cg22718310	chr1	8750518	RERE	OpenSea	intron	0.94	0.69
cg19872136	chr1	8759920	RERE	Shelf	intron	0.9	0.7
cg02387474	chr1	8763006	RERE	Island	intron	0.012	0.065
cg18269493	chr1	8772984	RERE	OpenSea	intron	0.49	0.32
cg20325800	chr1	8787360	RERE	OpenSea	intron	0.91	0.73
cg11952914	chr1	8800647	RERE	OpenSea	intron	0.91	0.66
cg11832727	chr1	8877257	RERE	Island	exon	0.016	0.061
cg22816534	chr1	8877774	RERE	Island	upstream	0.032	0.11
cg15625451	chr1	8878225	RERE	Shore	upstream	0.015	0.067
cg08341978	chr1	8878227	RERE	Shore	upstream	0.011	0.078
cg15693793	chr1	8880657		Shelf	intergenic	0.89	0.55
cg26401551	chr1	8889780		OpenSea	intergenic	0.21	0.12
cg25849281	chr1	8937077	ENO1	Shore	intron	0.56	0.4
cg10365178	chr1	8938099	ENO1	Island	intron	0.013	0.056
cg21691089	chr1	8938721	ENO1	Island	exon	0.016	0.078
cg07483064	chr1	8938751	ENO1	Island	exon	0.025	0.1
cg22221490	chr1	8938754	ENO1	Island	exon	0.044	0.21
cg12902497	chr1	8938815	ENO1	Island	exon	0.049	0.16
cg01803717	chr1	8939106	ENO1	Island	ncRNA	0.018	0.091
cg12486756	chr1	8953511		OpenSea	intergenic	0.95	0.89
cg20510033	chr1	8960134		OpenSea	intergenic	0.82	0.63
cg10207928	chr1	8963950		OpenSea	intergenic	0.62	0.5
cg00594907	chr1	9005719	CA6	OpenSea	upstream	0.86	0.56
cg02981703	chr1	9005734	CA6	OpenSea	upstream	0.86	0.69
cg07601804	chr1	9023134	CA6	OpenSea	intron	0.63	0.35
cg24885723	chr1	9030439	CA6	OpenSea	intron	0.94	0.68
cg04785083	chr1	9031262	CA6	OpenSea	intron	0.88	0.65
cg12102235	chr1	9047007		OpenSea	intergenic	0.77	0.37
cg21399021	chr1	9048292		OpenSea	intergenic	0.039	0.12
cg20253105	chr1	9050096		OpenSea	intergenic	0.72	0.5
cg00935435	chr1	9062897		OpenSea	downstream	0.92	0.7
cg03216475	chr1	9066015	SLC2A7	OpenSea	intron	0.79	0.65
cg21807930	chr1	9074902	SLC2A7	OpenSea	exon	0.88	0.62
cg26529484	chr1	9078214	SLC2A7	OpenSea	intron	0.96	0.89
cg04437482	chr1	9078354	SLC2A7	OpenSea	exon	0.82	0.68
cg16084788	chr1	9086146	SLC2A7	OpenSea	intron	0.94	0.71
cg09121478	chr1	9086460	SLC2A7	OpenSea	upstream	0.9	0.8
cg00648005	chr1	9086914	SLC2A7	OpenSea	upstream	0.53	0.44
cg00113315	chr1	9098035	SLC2A5	Shore	exon	0.79	0.63
cg02497830	chr1	9099281	SLC2A5	Island	intron	0.82	0.92
cg15545739	chr1	9100316	SLC2A5	Island	intron	0.83	0.68
cg21272576	chr1	9101465	SLC2A5	Shore	exon	0.95	0.59
cg00155732	chr1	9103309	SLC2A5	Shelf	intron	0.89	0.78
cg04901835	chr1	9127501	SLC2A5	OpenSea	intron	0.45	0.35
cg24293126	chr1	9127841	SLC2A5	Shelf	intron	0.91	0.67
cg02289343	chr1	9131622	SLC2A5	Island	intergenic	0.89	0.67
cg18800329	chr1	9132196	SLC2A5	Shore	intergenic	0.93	0.87
cg21689824	chr1	9134618	SLC2A5	Shelf	intergenic	0.4	0.22
cg14565651	chr1	9145034	SLC2A5	OpenSea	intergenic	0.56	0.35
cg08644511	chr1	9171147	GPR157	OpenSea	intron	0.23	0.17
cg20284891	chr1	9182171	GPR157	OpenSea	intron	0.94	0.79
cg19863456	chr1	9186001	GPR157	Shelf	intron	0.88	0.65
cg03583311	chr1	9187976	GPR157	Shore	intron	0.48	0.68
cg17940013	chr1	9188688	GPR157	Island	intron	0.29	0.24
cg06374766	chr1	9188925	GPR157	Island	exon	0.089	0.15
cg12271223	chr1	9189272	GPR157	Island	upstream	0.037	0.11
cg03520085	chr1	9189344	GPR157	Island	upstream	0.063	0.2
cg11713044	chr1	9192948		Shelf	intergenic	0.91	0.71
cg13116478	chr1	9217203		OpenSea	intergenic	0.94	0.68
cg05814135	chr1	9241160		Shore	intergenic	0.84	0.65
cg08736918	chr1	9241615		Shore	intergenic	0.17	0.1
cg16552153	chr1	9244565		Shore	intergenic	0.95	0.67
cg13693328	chr1	9256341		Shelf	intergenic	0.39	0.3
cg18265147	chr1	9256671		Shore	intergenic	0.15	0.3
cg07975828	chr1	9256739		Shore	intergenic	0.044	0.12
cg05933510	chr1	9257092		Shore	intergenic	0.77	0.63
cg04093381	chr1	9292094		Shelf	intergenic	0.43	0.33
cg21546874	chr1	9294571	H6PD	Island	upstream	0.012	0.048
cg02676476	chr1	9323181	H6PD	Shore	intron	0.79	0.45
cg06947205	chr1	9323884	H6PD	Shore	exon	0.97	0.83
cg01975877	chr1	9324232	H6PD	Island	exon	0.77	0.84
cg18595639	chr1	9324274	H6PD	Island	exon	0.86	0.93
cg13131263	chr1	9324393	H6PD	Island	exon	0.94	0.71
cg17114375	chr1	9324830	H6PD	Island	exon	0.86	0.86
cg19285508	chr1	9325015	H6PD	Island	exon	0.93	0.73
cg16411216	chr1	9340507		OpenSea	intergenic	0.085	0.22
cg12458866	chr1	9353610	SPSB1	OpenSea	intron	0.025	0.087
cg01980735	chr1	9371406	SPSB1	OpenSea	intron	0.47	0.31
cg03116948	chr1	9381431	SPSB1	OpenSea	intron	0.86	0.63
cg01437439	chr1	9383245	SPSB1	OpenSea	intron	0.63	0.76
cg00890054	chr1	9405823	SPSB1	OpenSea	intron	0.78	0.45
cg10709351	chr1	9409560	SPSB1	OpenSea	intron	0.9	0.93
cg06773963	chr1	9416303	SPSB1	Island	exon	0.97	0.82
cg02281006	chr1	9419970	SPSB1	Shelf	intron	0.94	0.68
cg11518950	chr1	9427305	SPSB1	Shore	intron	0.93	0.65
cg20973421	chr1	9427650	SPSB1	Island	exon	0.98	0.9
cg17984641	chr1	9427704	SPSB1	Island	exon	0.97	0.86
cg25468681	chr1	9428106	SPSB1	Shore	exon	0.96	0.88
cg00952054	chr1	9437047		OpenSea	intergenic	0.82	0.45
cg18114129	chr1	9477578		OpenSea	intergenic	0.87	0.64
cg04785675	chr1	9488897		Shore	ncRNA	0.0079	0.079
cg20982311	chr1	9489248		Island	upstream	0.12	0.19
cg10992465	chr1	9504049		OpenSea	intergenic	0.81	0.7
cg21686171	chr1	9504429		OpenSea	intergenic	0.93	0.76
cg20615827	chr1	9515447		OpenSea	intergenic	0.95	0.78
cg11826452	chr1	9599026	SLC25A33	Shore	upstream	0.53	0.24
cg23824902	chr1	9619882	SLC25A33	OpenSea	intron	0.9	0.65
cg06927343	chr1	9635799	SLC25A33	OpenSea	intron	0.96	0.82
cg02252265	chr1	9648038	TMEM201	Shore	upstream	0.89	0.61
cg02206861	chr1	9648945	TMEM201	Island	exon	0.04	0.097
cg21003981	chr1	9649299	TMEM201	Island	intron	0.03	0.12
cg24304972	chr1	9663509	TMEM201	OpenSea	exon	0.91	0.59
cg15685988	chr1	9664205	TMEM201	OpenSea	exon	0.62	0.85
cg03890628	chr1	9666902	TMEM201	Shelf	intron	0.47	0.64
cg06099126	chr1	9670729	TMEM201	Island	exon	0.93	0.73
cg19813187	chr1	9671004	TMEM201	Shore	intron	0.94	0.71
cg21643298	chr1	9683340		Shelf	intergenic	0.96	0.77
cg17467525	chr1	9686523		Shore	intergenic	0.58	0.28
cg21164509	chr1	9689803		Shelf	intergenic	0.77	0.44
cg16037569	chr1	9710867	PIK3CD	Shore	upstream	0.93	0.55
cg16895792	chr1	9711653	PIK3CD	Shore	upstream	0.11	0.24
cg17325959	chr1	9711961	PIK3CD	Island	intron	0.029	0.13
cg01666040	chr1	9712687	C1orf200	PIK3CD	Island	ncRNA	0.0083	0.07
cg18284427	chr1	9713284	C1orf200	PIK3CD	Shore	ncRNA	0.73	0.37
cg00231528	chr1	9714280	C1orf200	PIK3CD	Shore	ncRNA	0.5	0.39
cg08854008	chr1	9714397	C1orf200	PIK3CD	Shore	ncRNA	0.57	0.31
cg11334709	chr1	9716019	C1orf200	PIK3CD	Shelf	intron	0.62	0.35
cg04287259	chr1	9730401	PIK3CD	OpenSea	intron	0.58	0.49
cg07315642	chr1	9731272	PIK3CD	OpenSea	intron	0.95	0.7
cg19309580	chr1	9747263	PIK3CD	Shelf	ncRNA	0.13	0.25
cg03265564	chr1	9748971	PIK3CD	Shore	intron	0.51	0.67
cg20681184	chr1	9750813	PIK3CD	Shore	intron	0.92	0.77
cg14089636	chr1	9760357	PIK3CD	OpenSea	intron	0.8	0.63
cg22427575	chr1	9772111	PIK3CD	Shelf	intron	0.94	0.58
cg09706586	chr1	9775838	PIK3CD	Island	intron	0.75	0.87
cg07805542	chr1	9779309	PIK3CD	Shelf	intron	0.34	0.26
cg23799532	chr1	9780906	PIK3CD	OpenSea	exon	0.93	0.74
cg04608004	chr1	9781268	PIK3CD	OpenSea	exon	0.95	0.81
cg11145162	chr1	9787350	PIK3CD	Shelf	exon	0.43	0.59
cg07970040	chr1	9789165	CLSTN1	PIK3CD	Shore	exon	0.9	0.71
cg02769865	chr1	9789982	CLSTN1	Shore	exon	0.89	0.59
cg17423089	chr1	9790532	CLSTN1	Island	exon	0.92	0.65
cg24060317	chr1	9792986	CLSTN1	Shore	intron	0.83	0.29
cg08478622	chr1	9795222	CLSTN1	Shelf	exon	0.92	0.71
cg12657380	chr1	9795590	CLSTN1	OpenSea	exon	0.96	0.64
cg02481741	chr1	9800878	CLSTN1	OpenSea	intron	0.97	0.88
cg19090068	chr1	9804532	CLSTN1	OpenSea	exon	0.95	0.77
cg00996875	chr1	9825174	CLSTN1	Shelf	intron	0.85	0.55
cg15678052	chr1	9844683	CLSTN1	OpenSea	intron	0.93	0.71
cg07589991	chr1	9847879	CLSTN1	OpenSea	intron	0.81	0.43
cg25405962	chr1	9852785	CLSTN1	OpenSea	intron	0.25	0.46
cg13202082	chr1	9882851	CLSTN1	Shore	intron	0.024	0.14
cg05599320	chr1	9883032	CLSTN1	Island	intron	0.021	0.072
cg00941241	chr1	9885960	CLSTN1	Shore	intergenic	0.097	0.059
cg13871843	chr1	9887984		Shelf	intergenic	0.95	0.85
cg14037769	chr1	9895799		OpenSea	intergenic	0.29	0.52
cg03401488	chr1	9921621	CTNNBIP1	OpenSea	intron	0.72	0.52
cg12814199	chr1	9935516	CTNNBIP1	OpenSea	intron	0.55	0.7
cg16578549	chr1	9950732	CTNNBIP1	OpenSea	intron	0.65	0.53
cg24086140	chr1	9965884	CTNNBIP1	Shelf	intron	0.93	0.76
cg10740965	chr1	9969647	CTNNBIP1	Shore	intron	0.082	0.047
cg17973407	chr1	9969906	CTNNBIP1	Island	intron	0.031	0.13
cg27566521	chr1	9970633	CTNNBIP1	Island	upstream	0.05	0.17
cg08893875	chr1	9970636	CTNNBIP1	Island	upstream	0.017	0.063
cg07584845	chr1	9970639	CTNNBIP1	Island	upstream	0.077	0.23
cg17972631	chr1	9970653	CTNNBIP1	Island	upstream	0.039	0.14
cg01576340	chr1	9970659	CTNNBIP1	Island	upstream	0.022	0.11
cg24842740	chr1	9973750		Shelf	intergenic	0.94	0.77
cg00533749	chr1	9992130	LZIC	OpenSea	intron	0.7	0.37
cg26370409	chr1	10002828	NMNAT1	LZIC	Shore	upstream	0.062	0.15
cg04413397	chr1	10003059	NMNAT1	LZIC	Shore	exon	0.04	0.26
cg26685197	chr1	10003173	NMNAT1	LZIC	Island	intron	0.032	0.081
cg06853505	chr1	10003752	NMNAT1	LZIC	Shore	intron	0.014	0.1
cg22393461	chr1	10010658	NMNAT1	OpenSea	intron	0.088	0.21
cg04407233	chr1	10042538	NMNAT1	OpenSea	exon	0.75	0.8
cg02051553	chr1	10044519	NMNAT1	OpenSea	exon	0.41	0.57
cg10796749	chr1	10056837	RBP7	Shore	upstream	0.75	0.57
cg14202757	chr1	10056846	RBP7	Shore	upstream	0.66	0.52
cg20413202	chr1	10056853	RBP7	Shore	upstream	0.85	0.62
cg23107691	chr1	10057303	RBP7	Island	exon	0.14	0.32
cg07224455	chr1	10058340	RBP7	Shore	intron	0.96	0.83
cg09852008	chr1	10092689	UBE4B	Island	upstream	0.03	0.11
cg02974126	chr1	10092691	UBE4B	Island	upstream	0.089	0.34
cg21180178	chr1	10093010	UBE4B	Island	upstream	0.0063	0.031
cg15707544	chr1	10093239	UBE4B	Island	exon	0.04	0.098
cg00993191	chr1	10093703	UBE4B	Shore	exon	0.032	0.098
cg03649796	chr1	10106565	UBE4B	OpenSea	intron	0.44	0.59
cg08737543	chr1	10118766	UBE4B	OpenSea	intron	0.78	0.91
cg07209987	chr1	10221203	UBE4B	OpenSea	exon	0.43	0.56
cg27508545	chr1	10240017	UBE4B	OpenSea	exon	0.26	0.51
cg23661000	chr1	10240025	UBE4B	OpenSea	exon	0.37	0.69
cg12614519	chr1	10266991		Shelf	intergenic	0.96	0.79
cg05390356	chr1	10277983	KIF1B	OpenSea	intron	0.36	0.26
cg08899504	chr1	10363631	KIF1B	OpenSea	exon	0.95	0.84
cg26247646	chr1	10363989	KIF1B	OpenSea	exon	0.8	0.47
cg16292782	chr1	10383706	KIF1B	Shelf	intron	0.87	0.66
cg12402427	chr1	10386331	KIF1B	Island	exon	0.98	0.92
cg11532578	chr1	10387937	KIF1B	Shore	intron	0.98	0.74
cg11802797	chr1	10437649	KIF1B	OpenSea	exon	0.28	0.14
cg00147627	chr1	10455147		Shelf	intergenic	0.94	0.76
cg12796186	chr1	10458599	PGD	Island	upstream	0.022	0.11
cg17520927	chr1	10458905	PGD	Island	upstream	0.026	0.15
cg22341865	chr1	10459003	PGD	Island	upstream	0.0085	0.065
cg14718680	chr1	10459268	PGD	Island	exon	0.045	0.11
cg02916418	chr1	10480153	PGD	OpenSea	exon	0.77	0.88
cg24512897	chr1	10486966		Shelf	intergenic	0.96	0.73
cg07384165	chr1	10488281		Shore	intergenic	0.044	0.14
cg06925060	chr1	10489288	APITD1	Shore	upstream	0.86	0.64
[truncated: 159,795 more rows]
[truncated: 20 more columns]
